# Supplementary material for: Research on quality evaluation of innovation and entrepreneurship education for college students based on random forest algorithm and logistic regression model
Source: PeerJ journal article supplement (doi:10.7717/peerj-cs.1329), 2023-04-17
Supplement: Supplementary_file.zip [file Quality evaluation of innovation and entrepreneurship education in colleges and universities.xlsx]

## Sheet: Sheet1
Serial number	3、The resources, contents and materials of I&E are complete	3、The teaching method is unanimous	3、The training and practices of the I&E method is good	3、The contents of the curriculum have good relevance to professional courses	3、The curriculum is globally competitive	4、Proper and relevant training is incorporated as a professional activity	4、Training is given to students by well qualified trainers	5、Sufficient resources like smart rooms, workspaces, project development platforms, activity rooms etc are provided	5、Usage of Information and Communication Technology (ICT) tools	5、Financial policy and support to I&E activities	6、Well qualified teachers	6、Development of I&E culture in teachers	6、Enough number of teachers	6、Availability of teachers in all disciplines	6、Experience and research capability of teachers	7、Constitution of entrepreneurial clubs	7、Conduction of seminars, guest lectures, symposiums, contests, workshops, conferences and outreach activities.
1	Disagree	Disagree	Agree	Neutral	Neutral	Agree	Neutral	Agree	Agree	Neutral	Neutral	Strongly Disagree	Disagree	Neutral	Disagree	Strongly Agree	Strongly Agree
2	Strongly Disagree	Disagree	Neutral	Neutral	Neutral	Neutral	Neutral	Disagree	Neutral	Strongly Disagree	Disagree	Strongly Disagree	Disagree	Neutral	Strongly Disagree	Disagree	Agree
3	Agree	Neutral	Agree	Disagree	Agree	Disagree	Neutral	Agree	Agree	Neutral	Strongly Disagree	Strongly Disagree	Disagree	Neutral	Neutral	Agree	Strongly Agree
4	Agree	Agree	Agree	Agree	Strongly Agree	Strongly Agree	Agree	Neutral	Neutral	Neutral	Strongly Agree	Agree	Strongly Agree	Strongly Agree	Strongly Agree	Agree	Agree
5	Neutral	Strongly Disagree	Disagree	Neutral	Agree	Agree	Neutral	Disagree	Strongly Disagree	Neutral	Strongly Disagree	Neutral	Strongly Disagree	Strongly Disagree	Strongly Disagree	Agree	Agree
6	Disagree	Strongly Disagree	Neutral	Neutral	Disagree	Strongly Agree	Agree	Agree	Neutral	Neutral	Neutral	Agree	Agree	Agree	Neutral	Agree	Strongly Agree
7	Agree	Agree	Agree	Strongly Agree	Neutral	Strongly Disagree	Strongly Disagree	Disagree	Disagree	Neutral	Neutral	Agree	Neutral	Agree	Neutral	Agree	Neutral
8	Neutral	Agree	Neutral	Disagree	Neutral	Strongly Disagree	Neutral	Neutral	Neutral	Disagree	Neutral	Strongly Disagree	Agree	Neutral	Neutral	Disagree	Neutral
9	Strongly Agree	Strongly Agree	Strongly Agree	Strongly Agree	Strongly Agree	Strongly Agree	Strongly Agree	Agree	Neutral	Agree	Agree	Agree	Agree	Agree	Strongly Agree	Disagree	Agree
10	Neutral	Disagree	Agree	Agree	Disagree	Strongly Agree	Agree	Strongly Agree	Strongly Agree	Strongly Agree	Neutral	Disagree	Disagree	Neutral	Agree	Agree	Agree
11	Neutral	Neutral	Disagree	Neutral	Agree	Disagree	Disagree	Disagree	Disagree	Agree	Neutral	Strongly Disagree	Disagree	Neutral	Neutral	Neutral	Neutral
12	Neutral	Neutral	Agree	Agree	Neutral	Agree	Agree	Agree	Neutral	Strongly Agree	Neutral	Neutral	Agree	Disagree	Neutral	Neutral	Strongly Disagree
13	Strongly Agree	Agree	Strongly Agree	Agree	Strongly Agree	Strongly Agree	Strongly Agree	Agree	Neutral	Agree	Agree	Agree	Neutral	Strongly Agree	Agree	Agree	Agree
14	Strongly Agree	Strongly Agree	Strongly Agree	Strongly Agree	Strongly Agree	Agree	Strongly Agree	Strongly Agree	Agree	Strongly Agree	Strongly Agree	Strongly Agree	Strongly Agree	Strongly Agree	Strongly Agree	Strongly Agree	Strongly Agree
15	Strongly Agree	Agree	Strongly Agree	Strongly Agree	Strongly Agree	Agree	Neutral	Disagree	Strongly Disagree	Disagree	Strongly Agree	Strongly Agree	Strongly Agree	Agree	Agree	Strongly Disagree	Strongly Disagree
16	Strongly Disagree	Neutral	Neutral	Neutral	Disagree	Agree	Neutral	Disagree	Strongly Disagree	Neutral	Neutral	Strongly Disagree	Agree	Agree	Neutral	Strongly Disagree	Strongly Disagree
17	Agree	Agree	Agree	Strongly Agree	Agree	Agree	Neutral	Strongly Agree	Strongly Agree	Strongly Agree	Neutral	Neutral	Neutral	Neutral	Disagree	Agree	Agree
18	Strongly Agree	Strongly Agree	Strongly Agree	Strongly Agree	Strongly Agree	Strongly Agree	Strongly Agree	Strongly Agree	Agree	Strongly Agree	Agree	Agree	Strongly Agree	Neutral	Agree	Strongly Agree	Strongly Agree
19	Agree	Neutral	Strongly Agree	Agree	Strongly Agree	Strongly Agree	Strongly Agree	Strongly Agree	Strongly Agree	Strongly Agree	Strongly Agree	Agree	Strongly Agree	Strongly Agree	Agree	Strongly Agree	Strongly Agree
20	Strongly Agree	Agree	Strongly Agree	Strongly Agree	Strongly Agree	Strongly Agree	Strongly Agree	Strongly Agree	Strongly Agree	Strongly Agree	Strongly Agree	Strongly Agree	Strongly Agree	Agree	Strongly Agree	Agree	Strongly Agree
21	Strongly Agree	Agree	Strongly Agree	Strongly Agree	Agree	Strongly Agree	Strongly Agree	Strongly Agree	Strongly Agree	Strongly Agree	Agree	Agree	Neutral	Neutral	Neutral	Agree	Agree
22	Disagree	Strongly Disagree	Disagree	Neutral	Disagree	Neutral	Disagree	Disagree	Neutral	Disagree	Neutral	Disagree	Disagree	Neutral	Neutral	Strongly Agree	Strongly Agree
23	Disagree	Neutral	Neutral	Neutral	Disagree	Agree	Strongly Agree	Disagree	Neutral	Neutral	Neutral	Neutral	Neutral	Agree	Neutral	Agree	Disagree
24	Strongly Agree	Agree	Agree	Strongly Agree	Strongly Agree	Strongly Agree	Agree	Neutral	Neutral	Disagree	Neutral	Strongly Disagree	Strongly Disagree	Neutral	Disagree	Strongly Agree	Strongly Agree
25	Strongly Agree	Strongly Agree	Strongly Agree	Strongly Agree	Agree	Disagree	Agree	Strongly Disagree	Neutral	Disagree	Disagree	Neutral	Disagree	Strongly Disagree	Neutral	Strongly Agree	Strongly Agree
26	Agree	Strongly Agree	Agree	Agree	Strongly Agree	Neutral	Agree	Neutral	Agree	Neutral	Neutral	Neutral	Neutral	Disagree	Strongly Disagree	Agree	Strongly Agree
27	Neutral	Neutral	Strongly Disagree	Agree	Neutral	Neutral	Neutral	Neutral	Neutral	Agree	Agree	Strongly Agree	Agree	Agree	Strongly Agree	Agree	Neutral
28	Agree	Agree	Neutral	Disagree	Neutral	Agree	Neutral	Strongly Agree	Strongly Agree	Strongly Agree	Strongly Agree	Strongly Agree	Strongly Agree	Strongly Agree	Strongly Agree	Agree	Strongly Agree
29	Neutral	Agree	Neutral	Disagree	Neutral	Neutral	Neutral	Strongly Disagree	Disagree	Neutral	Agree	Neutral	Neutral	Agree	Agree	Agree	Neutral
30	Disagree	Neutral	Neutral	Neutral	Strongly Disagree	Strongly Disagree	Strongly Disagree	Neutral	Disagree	Disagree	Neutral	Disagree	Neutral	Agree	Neutral	Agree	Neutral
31	Agree	Agree	Neutral	Agree	Agree	Neutral	Disagree	Agree	Strongly Agree	Agree	Agree	Neutral	Agree	Neutral	Agree	Disagree	Neutral
32	Strongly Agree	Strongly Agree	Strongly Agree	Strongly Agree	Strongly Agree	Strongly Agree	Strongly Agree	Strongly Agree	Strongly Agree	Strongly Agree	Agree	Agree	Agree	Agree	Agree	Strongly Agree	Strongly Agree
33	Agree	Agree	Agree	Agree	Agree	Disagree	Strongly Disagree	Disagree	Disagree	Neutral	Disagree	Neutral	Neutral	Disagree	Neutral	Agree	Neutral
34	Neutral	Agree	Agree	Disagree	Neutral	Strongly Disagree	Neutral	Neutral	Agree	Strongly Agree	Strongly Disagree	Neutral	Disagree	Neutral	Strongly Disagree	Neutral	Strongly Disagree
35	Strongly Disagree	Disagree	Neutral	Neutral	Neutral	Neutral	Disagree	Agree	Agree	Agree	Strongly Disagree	Neutral	Disagree	Disagree	Neutral	Neutral	Disagree
36	Agree	Strongly Agree	Neutral	Agree	Agree	Agree	Agree	Strongly Agree	Strongly Agree	Strongly Agree	Neutral	Agree	Agree	Neutral	Neutral	Disagree	Agree
37	Agree	Neutral	Agree	Neutral	Agree	Strongly Disagree	Neutral	Disagree	Strongly Disagree	Neutral	Neutral	Neutral	Neutral	Neutral	Agree	Strongly Disagree	Neutral
38	Agree	Neutral	Disagree	Neutral	Agree	Neutral	Disagree	Agree	Agree	Strongly Agree	Agree	Strongly Agree	Strongly Agree	Agree	Agree	Strongly Disagree	Neutral
39	Strongly Agree	Strongly Agree	Agree	Strongly Agree	Agree	Strongly Agree	Strongly Agree	Agree	Agree	Agree	Agree	Agree	Strongly Agree	Agree	Agree	Neutral	Agree
40	Strongly Agree	Strongly Agree	Strongly Agree	Strongly Agree	Agree	Strongly Agree	Agree	Agree	Neutral	Strongly Agree	Strongly Agree	Strongly Agree	Agree	Strongly Agree	Strongly Agree	Strongly Agree	Strongly Agree
41	Agree	Agree	Agree	Strongly Agree	Strongly Agree	Strongly Agree	Strongly Agree	Agree	Neutral	Neutral	Agree	Agree	Strongly Agree	Agree	Strongly Agree	Agree	Neutral
42	Strongly Agree	Agree	Strongly Agree	Strongly Agree	Strongly Agree	Strongly Agree	Strongly Agree	Strongly Agree	Agree	Agree	Neutral	Neutral	Agree	Neutral	Neutral	Agree	Strongly Agree
43	Disagree	Disagree	Strongly Disagree	Neutral	Disagree	Agree	Agree	Strongly Agree	Strongly Agree	Strongly Agree	Strongly Agree	Strongly Agree	Strongly Agree	Agree	Strongly Agree	Strongly Agree	Strongly Agree
44	Strongly Agree	Strongly Agree	Agree	Strongly Agree	Agree	Neutral	Disagree	Strongly Agree	Agree	Strongly Agree	Strongly Agree	Agree	Strongly Agree	Agree	Agree	Strongly Agree	Strongly Agree
45	Disagree	Neutral	Disagree	Disagree	Strongly Disagree	Disagree	Agree	Disagree	Disagree	Neutral	Agree	Neutral	Neutral	Agree	Agree	Neutral	Agree
46	Strongly Agree	Strongly Agree	Strongly Agree	Strongly Agree	Agree	Agree	Agree	Strongly Agree	Strongly Agree	Strongly Agree	Strongly Agree	Strongly Agree	Strongly Agree	Agree	Strongly Agree	Strongly Agree	Strongly Agree
47	Neutral	Agree	Disagree	Agree	Neutral	Neutral	Neutral	Disagree	Disagree	Strongly Disagree	Neutral	Strongly Disagree	Neutral	Strongly Disagree	Strongly Disagree	Neutral	Disagree
48	Agree	Agree	Agree	Agree	Agree	Strongly Agree	Strongly Agree	Strongly Agree	Strongly Agree	Agree	Disagree	Disagree	Disagree	Neutral	Neutral	Disagree	Strongly Disagree
49	Neutral	Neutral	Neutral	Agree	Strongly Disagree	Strongly Agree	Strongly Agree	Neutral	Agree	Neutral	Neutral	Disagree	Disagree	Neutral	Agree	Agree	Neutral
50	Disagree	Strongly Disagree	Agree	Disagree	Neutral	Disagree	Agree	Strongly Disagree	Disagree	Neutral	Disagree	Neutral	Strongly Disagree	Neutral	Strongly Disagree	Neutral	Neutral
51	Disagree	Agree	Neutral	Strongly Disagree	Neutral	Strongly Disagree	Neutral	Agree	Agree	Strongly Agree	Neutral	Neutral	Neutral	Neutral	Disagree	Agree	Disagree
52	Strongly Agree	Agree	Agree	Agree	Agree	Strongly Agree	Strongly Agree	Strongly Agree	Strongly Agree	Strongly Agree	Strongly Agree	Strongly Agree	Strongly Agree	Strongly Agree	Agree	Strongly Agree	Strongly Agree
53	Strongly Agree	Strongly Agree	Strongly Agree	Strongly Agree	Strongly Agree	Strongly Agree	Strongly Agree	Agree	Strongly Agree	Agree	Agree	Agree	Strongly Agree	Agree	Agree	Neutral	Strongly Agree
54	Strongly Agree	Agree	Strongly Agree	Agree	Agree	Agree	Strongly Agree	Strongly Agree	Strongly Agree	Strongly Agree	Agree	Neutral	Strongly Agree	Neutral	Strongly Agree	Neutral	Agree
55	Agree	Agree	Agree	Neutral	Neutral	Neutral	Neutral	Neutral	Agree	Neutral	Agree	Neutral	Strongly Agree	Neutral	Agree	Disagree	Agree
56	Agree	Agree	Strongly Agree	Agree	Agree	Strongly Disagree	Agree	Disagree	Neutral	Neutral	Disagree	Neutral	Disagree	Neutral	Neutral	Strongly Agree	Strongly Agree
57	Strongly Agree	Strongly Agree	Agree	Strongly Agree	Strongly Agree	Disagree	Neutral	Agree	Strongly Agree	Neutral	Disagree	Disagree	Disagree	Strongly Disagree	Neutral	Agree	Neutral
58	Neutral	Disagree	Strongly Disagree	Neutral	Neutral	Agree	Strongly Agree	Neutral	Strongly Disagree	Agree	Agree	Agree	Agree	Strongly Agree	Strongly Agree	Strongly Agree	Strongly Agree
59	Strongly Agree	Strongly Agree	Strongly Agree	Strongly Agree	Agree	Strongly Agree	Strongly Agree	Agree	Agree	Agree	Agree	Strongly Agree	Agree	Agree	Agree	Strongly Agree	Strongly Agree
60	Agree	Neutral	Agree	Agree	Neutral	Strongly Disagree	Strongly Disagree	Disagree	Neutral	Neutral	Strongly Disagree	Disagree	Neutral	Strongly Disagree	Neutral	Agree	Agree
61	Strongly Agree	Strongly Agree	Strongly Agree	Agree	Agree	Strongly Agree	Agree	Agree	Neutral	Agree	Strongly Agree	Strongly Agree	Strongly Agree	Agree	Strongly Agree	Agree	Strongly Agree
62	Strongly Agree	Strongly Agree	Strongly Agree	Strongly Agree	Agree	Agree	Neutral	Neutral	Neutral	Agree	Neutral	Neutral	Neutral	Neutral	Disagree	Agree	Neutral
63	Strongly Agree	Strongly Agree	Strongly Agree	Agree	Strongly Agree	Agree	Neutral	Neutral	Agree	Agree	Disagree	Disagree	Neutral	Neutral	Neutral	Agree	Agree
64	Agree	Disagree	Agree	Neutral	Agree	Agree	Agree	Agree	Strongly Agree	Agree	Strongly Agree	Strongly Agree	Agree	Strongly Agree	Agree	Disagree	Disagree
65	Strongly Agree	Agree	Agree	Agree	Agree	Agree	Agree	Strongly Disagree	Neutral	Neutral	Strongly Agree	Strongly Agree	Strongly Agree	Agree	Strongly Agree	Strongly Agree	Strongly Agree
66	Disagree	Neutral	Agree	Neutral	Neutral	Disagree	Neutral	Neutral	Agree	Agree	Disagree	Disagree	Neutral	Strongly Disagree	Neutral	Disagree	Disagree
67	Neutral	Agree	Neutral	Neutral	Agree	Strongly Agree	Agree	Strongly Agree	Strongly Agree	Strongly Agree	Strongly Agree	Strongly Agree	Strongly Agree	Strongly Agree	Strongly Agree	Strongly Agree	Strongly Agree
68	Strongly Agree	Strongly Agree	Agree	Strongly Agree	Strongly Agree	Agree	Neutral	Agree	Neutral	Strongly Agree	Strongly Agree	Agree	Strongly Agree	Strongly Agree	Strongly Agree	Strongly Agree	Strongly Agree
69	Agree	Strongly Agree	Agree	Agree	Agree	Strongly Agree	Strongly Agree	Agree	Neutral	Strongly Agree	Agree	Agree	Neutral	Agree	Strongly Agree	Strongly Agree	Strongly Agree
70	Agree	Agree	Agree	Neutral	Strongly Agree	Neutral	Disagree	Strongly Disagree	Neutral	Neutral	Strongly Disagree	Neutral	Disagree	Neutral	Neutral	Strongly Disagree	Disagree
71	Agree	Agree	Agree	Agree	Strongly Agree	Agree	Agree	Neutral	Agree	Neutral	Agree	Strongly Agree	Strongly Agree	Agree	Agree	Neutral	Strongly Disagree
72	Strongly Agree	Strongly Agree	Strongly Agree	Strongly Agree	Agree	Neutral	Agree	Strongly Agree	Strongly Agree	Strongly Agree	Agree	Strongly Agree	Neutral	Agree	Agree	Strongly Agree	Strongly Agree
73	Strongly Agree	Agree	Strongly Agree	Strongly Agree	Strongly Agree	Strongly Agree	Strongly Agree	Disagree	Strongly Disagree	Disagree	Agree	Strongly Agree	Strongly Agree	Agree	Agree	Strongly Agree	Strongly Agree
74	Disagree	Disagree	Agree	Disagree	Neutral	Agree	Neutral	Disagree	Strongly Disagree	Neutral	Agree	Neutral	Neutral	Neutral	Agree	Agree	Agree
75	Strongly Agree	Strongly Agree	Strongly Agree	Strongly Agree	Agree	Agree	Agree	Strongly Agree	Strongly Agree	Strongly Agree	Strongly Agree	Strongly Agree	Agree	Strongly Agree	Agree	Strongly Agree	Strongly Agree
76	Agree	Agree	Agree	Agree	Neutral	Agree	Neutral	Disagree	Neutral	Neutral	Agree	Neutral	Neutral	Agree	Strongly Agree	Agree	Disagree
77	Disagree	Disagree	Neutral	Disagree	Strongly Disagree	Neutral	Disagree	Neutral	Agree	Neutral	Disagree	Neutral	Neutral	Strongly Disagree	Strongly Disagree	Disagree	Strongly Disagree
78	Agree	Agree	Agree	Disagree	Neutral	Neutral	Disagree	Agree	Neutral	Agree	Neutral	Strongly Disagree	Agree	Disagree	Agree	Disagree	Neutral
79	Agree	Agree	Disagree	Strongly Agree	Agree	Strongly Agree	Agree	Disagree	Agree	Neutral	Neutral	Neutral	Neutral	Strongly Disagree	Strongly Disagree	Strongly Agree	Strongly Agree
80	Agree	Neutral	Agree	Disagree	Agree	Strongly Agree	Strongly Agree	Neutral	Agree	Agree	Strongly Agree	Strongly Agree	Strongly Agree	Strongly Agree	Strongly Agree	Strongly Agree	Strongly Agree
81	Agree	Strongly Agree	Agree	Agree	Agree	Agree	Agree	Strongly Agree	Strongly Agree	Strongly Agree	Strongly Agree	Agree	Strongly Agree	Strongly Agree	Agree	Strongly Agree	Strongly Agree
82	Strongly Agree	Agree	Strongly Agree	Agree	Strongly Agree	Strongly Agree	Strongly Agree	Agree	Neutral	Agree	Strongly Agree	Strongly Agree	Agree	Strongly Agree	Strongly Agree	Strongly Agree	Strongly Agree
83	Disagree	Disagree	Disagree	Neutral	Agree	Agree	Neutral	Neutral	Agree	Neutral	Neutral	Agree	Agree	Neutral	Neutral	Neutral	Strongly Agree
84	Agree	Neutral	Strongly Agree	Strongly Agree	Agree	Agree	Strongly Agree	Strongly Agree	Strongly Agree	Strongly Agree	Neutral	Agree	Disagree	Disagree	Neutral	Agree	Agree
85	Strongly Agree	Strongly Agree	Strongly Agree	Strongly Agree	Strongly Agree	Strongly Agree	Agree	Strongly Agree	Agree	Agree	Strongly Agree	Strongly Agree	Strongly Agree	Agree	Strongly Agree	Strongly Agree	Agree
86	Agree	Agree	Agree	Agree	Strongly Agree	Strongly Agree	Strongly Agree	Strongly Agree	Agree	Strongly Agree	Agree	Neutral	Strongly Agree	Agree	Agree	Strongly Agree	Strongly Agree
87	Strongly Agree	Strongly Agree	Strongly Agree	Strongly Agree	Strongly Agree	Neutral	Disagree	Strongly Agree	Strongly Agree	Strongly Agree	Strongly Agree	Strongly Agree	Strongly Agree	Strongly Agree	Agree	Strongly Agree	Strongly Agree
88	Disagree	Neutral	Disagree	Neutral	Disagree	Disagree	Neutral	Neutral	Agree	Disagree	Neutral	Agree	Disagree	Agree	Neutral	Agree	Strongly Agree
89	Agree	Agree	Agree	Agree	Agree	Strongly Agree	Strongly Agree	Strongly Agree	Strongly Agree	Strongly Agree	Strongly Agree	Strongly Agree	Strongly Agree	Strongly Agree	Strongly Agree	Strongly Agree	Strongly Agree
90	Strongly Agree	Strongly Agree	Strongly Agree	Strongly Agree	Strongly Agree	Strongly Agree	Strongly Agree	Agree	Strongly Agree	Strongly Agree	Strongly Agree	Agree	Strongly Agree	Strongly Agree	Agree	Strongly Agree	Agree
91	Neutral	Strongly Disagree	Disagree	Disagree	Agree	Neutral	Neutral	Strongly Agree	Strongly Agree	Strongly Agree	Agree	Strongly Agree	Strongly Agree	Strongly Agree	Agree	Disagree	Disagree
92	Strongly Agree	Strongly Agree	Strongly Agree	Agree	Strongly Agree	Strongly Agree	Strongly Agree	Neutral	Neutral	Neutral	Strongly Agree	Strongly Agree	Strongly Agree	Strongly Agree	Agree	Strongly Agree	Strongly Agree
93	Strongly Disagree	Neutral	Disagree	Strongly Disagree	Neutral	Agree	Neutral	Neutral	Disagree	Neutral	Disagree	Neutral	Neutral	Disagree	Neutral	Strongly Agree	Agree
94	Neutral	Disagree	Agree	Neutral	Agree	Strongly Disagree	Neutral	Strongly Disagree	Neutral	Neutral	Neutral	Strongly Disagree	Disagree	Neutral	Neutral	Disagree	Strongly Disagree
95	Strongly Agree	Strongly Agree	Strongly Agree	Strongly Agree	Strongly Agree	Strongly Agree	Strongly Agree	Strongly Agree	Strongly Agree	Strongly Agree	Strongly Agree	Strongly Agree	Strongly Agree	Strongly Agree	Agree	Agree	Strongly Agree
96	Agree	Strongly Agree	Strongly Agree	Agree	Strongly Agree	Agree	Agree	Strongly Agree	Strongly Agree	Agree	Agree	Agree	Agree	Strongly Agree	Strongly Agree	Disagree	Strongly Disagree
97	Neutral	Strongly Disagree	Neutral	Neutral	Agree	Neutral	Agree	Agree	Disagree	Agree	Strongly Disagree	Neutral	Disagree	Neutral	Disagree	Neutral	Strongly Disagree
98	Agree	Neutral	Agree	Agree	Agree	Agree	Strongly Agree	Neutral	Agree	Neutral	Agree	Neutral	Agree	Neutral	Agree	Strongly Disagree	Strongly Disagree
99	Strongly Agree	Agree	Strongly Agree	Strongly Agree	Strongly Agree	Strongly Agree	Strongly Agree	Strongly Agree	Strongly Agree	Strongly Agree	Agree	Strongly Agree	Agree	Strongly Agree	Agree	Agree	Neutral
100	Agree	Agree	Agree	Agree	Neutral	Agree	Strongly Agree	Strongly Disagree	Disagree	Neutral	Strongly Disagree	Disagree	Disagree	Neutral	Disagree	Agree	Agree
101	Strongly Agree	Strongly Agree	Strongly Agree	Agree	Agree	Strongly Agree	Strongly Agree	Agree	Strongly Agree	Strongly Agree	Strongly Agree	Strongly Agree	Strongly Agree	Strongly Agree	Strongly Agree	Strongly Agree	Strongly Agree
102	Agree	Disagree	Disagree	Agree	Neutral	Strongly Agree	Agree	Neutral	Neutral	Strongly Disagree	Neutral	Neutral	Disagree	Neutral	Agree	Disagree	Disagree
103	Agree	Strongly Agree	Neutral	Agree	Strongly Agree	Disagree	Disagree	Strongly Agree	Agree	Agree	Agree	Neutral	Strongly Agree	Neutral	Strongly Agree	Strongly Agree	Strongly Agree
104	Agree	Neutral	Neutral	Neutral	Strongly Agree	Neutral	Strongly Disagree	Agree	Strongly Agree	Strongly Agree	Neutral	Neutral	Agree	Neutral	Agree	Disagree	Neutral
105	Agree	Agree	Agree	Strongly Agree	Agree	Neutral	Agree	Neutral	Neutral	Neutral	Neutral	Agree	Neutral	Neutral	Neutral	Agree	Agree
106	Agree	Neutral	Disagree	Agree	Agree	Neutral	Strongly Disagree	Strongly Agree	Strongly Agree	Strongly Agree	Agree	Agree	Neutral	Strongly Agree	Agree	Strongly Agree	Strongly Agree
107	Agree	Agree	Agree	Disagree	Agree	Agree	Agree	Strongly Agree	Strongly Agree	Strongly Agree	Agree	Agree	Agree	Agree	Neutral	Agree	Strongly Disagree
108	Strongly Agree	Agree	Agree	Strongly Agree	Agree	Neutral	Agree	Agree	Strongly Agree	Agree	Strongly Agree	Agree	Strongly Agree	Strongly Agree	Agree	Strongly Agree	Agree
109	Agree	Strongly Agree	Strongly Agree	Agree	Neutral	Strongly Agree	Strongly Agree	Strongly Agree	Strongly Agree	Strongly Agree	Agree	Agree	Agree	Agree	Agree	Strongly Agree	Agree
110	Disagree	Neutral	Neutral	Neutral	Strongly Disagree	Disagree	Disagree	Strongly Disagree	Disagree	Disagree	Neutral	Neutral	Agree	Disagree	Agree	Agree	Agree
111	Strongly Agree	Strongly Agree	Agree	Strongly Agree	Strongly Agree	Strongly Agree	Strongly Agree	Strongly Agree	Strongly Agree	Strongly Agree	Agree	Neutral	Agree	Agree	Agree	Strongly Agree	Strongly Agree
112	Strongly Agree	Strongly Agree	Strongly Agree	Strongly Agree	Agree	Neutral	Neutral	Strongly Agree	Strongly Agree	Strongly Agree	Strongly Agree	Strongly Agree	Strongly Agree	Agree	Agree	Strongly Agree	Agree
113	Agree	Agree	Agree	Strongly Agree	Strongly Agree	Strongly Agree	Strongly Agree	Agree	Strongly Agree	Agree	Strongly Agree	Agree	Strongly Agree	Agree	Agree	Strongly Agree	Strongly Agree
114	Neutral	Agree	Neutral	Disagree	Neutral	Disagree	Strongly Disagree	Neutral	Strongly Disagree	Disagree	Disagree	Neutral	Neutral	Strongly Disagree	Neutral	Neutral	Strongly Disagree
115	Neutral	Strongly Disagree	Disagree	Strongly Disagree	Neutral	Neutral	Agree	Neutral	Disagree	Disagree	Strongly Disagree	Strongly Disagree	Disagree	Neutral	Neutral	Disagree	Strongly Disagree
116	Agree	Neutral	Neutral	Neutral	Neutral	Neutral	Agree	Agree	Strongly Agree	Neutral	Disagree	Neutral	Neutral	Disagree	Disagree	Strongly Disagree	Neutral
117	Agree	Agree	Agree	Strongly Agree	Strongly Agree	Disagree	Disagree	Agree	Strongly Agree	Neutral	Strongly Disagree	Neutral	Strongly Disagree	Strongly Disagree	Neutral	Neutral	Neutral
118	Strongly Agree	Strongly Agree	Strongly Agree	Strongly Agree	Strongly Agree	Strongly Agree	Strongly Agree	Strongly Agree	Agree	Strongly Agree	Agree	Strongly Agree	Agree	Strongly Agree	Strongly Agree	Strongly Agree	Agree
119	Strongly Agree	Agree	Strongly Agree	Agree	Agree	Strongly Agree	Strongly Agree	Strongly Agree	Strongly Agree	Strongly Agree	Strongly Agree	Strongly Agree	Strongly Agree	Strongly Agree	Strongly Agree	Strongly Agree	Strongly Agree
120	Agree	Neutral	Neutral	Agree	Agree	Neutral	Neutral	Strongly Disagree	Neutral	Strongly Disagree	Neutral	Disagree	Agree	Neutral	Neutral	Neutral	Agree
121	Agree	Neutral	Agree	Neutral	Agree	Strongly Agree	Agree	Strongly Agree	Strongly Agree	Agree	Strongly Agree	Strongly Agree	Agree	Strongly Agree	Agree	Strongly Agree	Agree
122	Neutral	Agree	Agree	Agree	Strongly Disagree	Agree	Agree	Strongly Agree	Strongly Agree	Agree	Agree	Neutral	Agree	Neutral	Agree	Strongly Disagree	Neutral
123	Agree	Strongly Agree	Agree	Agree	Strongly Agree	Agree	Neutral	Neutral	Neutral	Strongly Agree	Neutral	Neutral	Disagree	Neutral	Neutral	Neutral	Agree
124	Agree	Agree	Agree	Neutral	Agree	Strongly Agree	Agree	Agree	Neutral	Strongly Agree	Neutral	Disagree	Neutral	Agree	Agree	Agree	Disagree
125	Agree	Agree	Agree	Agree	Agree	Strongly Agree	Strongly Agree	Strongly Agree	Strongly Agree	Strongly Agree	Strongly Agree	Strongly Agree	Strongly Agree	Strongly Agree	Strongly Agree	Strongly Agree	Strongly Agree
126	Strongly Agree	Strongly Agree	Agree	Strongly Agree	Agree	Agree	Agree	Strongly Agree	Agree	Strongly Agree	Strongly Agree	Agree	Strongly Agree	Agree	Strongly Agree	Strongly Disagree	Neutral
127	Agree	Strongly Agree	Neutral	Agree	Neutral	Strongly Disagree	Disagree	Disagree	Neutral	Neutral	Strongly Disagree	Disagree	Neutral	Strongly Disagree	Neutral	Neutral	Agree
128	Strongly Agree	Strongly Agree	Agree	Strongly Agree	Agree	Strongly Agree	Strongly Agree	Strongly Agree	Strongly Agree	Strongly Agree	Agree	Agree	Agree	Agree	Agree	Strongly Agree	Strongly Agree
129	Disagree	Neutral	Neutral	Neutral	Strongly Disagree	Disagree	Disagree	Agree	Agree	Agree	Neutral	Neutral	Disagree	Agree	Agree	Agree	Agree
130	Agree	Neutral	Neutral	Agree	Neutral	Strongly Agree	Strongly Agree	Strongly Agree	Strongly Agree	Strongly Agree	Strongly Agree	Agree	Strongly Agree	Agree	Strongly Agree	Strongly Agree	Strongly Agree
131	Disagree	Disagree	Neutral	Agree	Disagree	Agree	Strongly Agree	Agree	Strongly Agree	Strongly Agree	Agree	Agree	Agree	Strongly Agree	Agree	Strongly Agree	Strongly Agree
132	Disagree	Neutral	Strongly Disagree	Neutral	Neutral	Strongly Disagree	Neutral	Neutral	Disagree	Strongly Disagree	Neutral	Neutral	Neutral	Disagree	Neutral	Neutral	Agree
133	Strongly Agree	Strongly Agree	Strongly Agree	Agree	Agree	Strongly Agree	Agree	Strongly Agree	Agree	Strongly Agree	Agree	Strongly Agree	Neutral	Agree	Strongly Agree	Strongly Agree	Strongly Agree
134	Strongly Agree	Strongly Agree	Strongly Agree	Strongly Agree	Strongly Agree	Strongly Agree	Strongly Agree	Agree	Strongly Agree	Neutral	Strongly Agree	Strongly Agree	Strongly Agree	Agree	Strongly Agree	Agree	Strongly Agree
135	Strongly Agree	Strongly Agree	Strongly Agree	Strongly Agree	Strongly Agree	Strongly Agree	Strongly Agree	Strongly Agree	Strongly Agree	Agree	Strongly Disagree	Neutral	Strongly Disagree	Disagree	Neutral	Strongly Agree	Strongly Agree
136	Agree	Strongly Agree	Agree	Agree	Agree	Agree	Neutral	Neutral	Disagree	Neutral	Neutral	Agree	Neutral	Neutral	Agree	Strongly Agree	Strongly Agree
137	Strongly Agree	Strongly Agree	Strongly Agree	Strongly Agree	Strongly Agree	Strongly Agree	Strongly Agree	Strongly Agree	Agree	Agree	Neutral	Strongly Disagree	Agree	Disagree	Strongly Disagree	Strongly Agree	Strongly Agree
138	Strongly Agree	Strongly Agree	Strongly Agree	Strongly Agree	Strongly Agree	Strongly Agree	Strongly Agree	Strongly Agree	Agree	Strongly Agree	Agree	Agree	Agree	Neutral	Agree	Agree	Strongly Agree
139	Agree	Agree	Neutral	Neutral	Strongly Agree	Disagree	Disagree	Strongly Agree	Strongly Agree	Strongly Agree	Neutral	Neutral	Disagree	Neutral	Agree	Strongly Agree	Strongly Agree
140	Strongly Agree	Strongly Agree	Strongly Agree	Agree	Strongly Agree	Strongly Agree	Strongly Agree	Neutral	Neutral	Agree	Agree	Neutral	Agree	Agree	Neutral	Strongly Agree	Strongly Agree
141	Agree	Agree	Agree	Strongly Agree	Agree	Neutral	Agree	Strongly Agree	Agree	Strongly Agree	Neutral	Agree	Neutral	Agree	Neutral	Agree	Agree
142	Strongly Agree	Agree	Strongly Agree	Strongly Agree	Strongly Agree	Strongly Agree	Strongly Agree	Agree	Strongly Agree	Neutral	Agree	Neutral	Neutral	Strongly Agree	Neutral	Strongly Agree	Strongly Agree
143	Agree	Disagree	Neutral	Neutral	Neutral	Strongly Agree	Strongly Agree	Agree	Agree	Neutral	Agree	Neutral	Agree	Agree	Neutral	Strongly Agree	Strongly Agree
144	Disagree	Strongly Disagree	Strongly Disagree	Neutral	Neutral	Strongly Agree	Strongly Agree	Agree	Agree	Strongly Agree	Neutral	Neutral	Agree	Disagree	Neutral	Disagree	Strongly Disagree
145	Agree	Neutral	Neutral	Strongly Agree	Neutral	Strongly Agree	Agree	Strongly Agree	Agree	Strongly Agree	Strongly Agree	Agree	Strongly Agree	Agree	Strongly Agree	Strongly Agree	Strongly Agree
146	Disagree	Strongly Disagree	Strongly Disagree	Strongly Disagree	Strongly Disagree	Disagree	Agree	Neutral	Neutral	Neutral	Disagree	Neutral	Strongly Disagree	Neutral	Strongly Disagree	Disagree	Agree
147	Strongly Agree	Strongly Agree	Strongly Agree	Strongly Agree	Strongly Agree	Strongly Agree	Strongly Agree	Strongly Agree	Strongly Agree	Strongly Agree	Strongly Agree	Strongly Agree	Agree	Agree	Strongly Agree	Agree	Agree
148	Strongly Agree	Agree	Agree	Agree	Agree	Strongly Agree	Strongly Agree	Strongly Agree	Strongly Agree	Agree	Neutral	Disagree	Neutral	Disagree	Neutral	Strongly Agree	Agree
149	Neutral	Disagree	Agree	Neutral	Neutral	Strongly Agree	Agree	Neutral	Neutral	Disagree	Neutral	Neutral	Neutral	Neutral	Neutral	Disagree	Disagree
150	Strongly Agree	Agree	Strongly Agree	Strongly Agree	Agree	Agree	Neutral	Neutral	Agree	Disagree	Neutral	Agree	Agree	Agree	Agree	Strongly Agree	Strongly Agree
151	Disagree	Neutral	Neutral	Neutral	Strongly Disagree	Disagree	Disagree	Neutral	Neutral	Neutral	Neutral	Neutral	Neutral	Disagree	Neutral	Disagree	Neutral
152	Strongly Agree	Strongly Agree	Strongly Agree	Strongly Agree	Strongly Agree	Strongly Agree	Strongly Agree	Neutral	Agree	Agree	Agree	Agree	Agree	Strongly Agree	Agree	Strongly Agree	Agree
153	Neutral	Neutral	Neutral	Agree	Disagree	Agree	Agree	Disagree	Neutral	Disagree	Strongly Disagree	Disagree	Neutral	Neutral	Neutral	Agree	Agree
154	Strongly Agree	Strongly Agree	Agree	Agree	Strongly Agree	Agree	Strongly Agree	Strongly Agree	Strongly Agree	Agree	Strongly Agree	Strongly Agree	Strongly Agree	Agree	Agree	Agree	Agree
155	Agree	Strongly Agree	Agree	Agree	Strongly Agree	Neutral	Neutral	Agree	Strongly Agree	Strongly Agree	Strongly Agree	Strongly Agree	Strongly Agree	Strongly Agree	Strongly Agree	Neutral	Disagree
156	Agree	Neutral	Agree	Agree	Neutral	Strongly Agree	Strongly Agree	Agree	Strongly Agree	Neutral	Neutral	Neutral	Neutral	Neutral	Agree	Strongly Agree	Strongly Agree
157	Strongly Agree	Agree	Strongly Agree	Strongly Agree	Strongly Agree	Agree	Agree	Strongly Agree	Strongly Agree	Strongly Agree	Neutral	Neutral	Neutral	Neutral	Strongly Disagree	Strongly Agree	Strongly Agree
158	Agree	Agree	Agree	Agree	Strongly Agree	Strongly Agree	Agree	Strongly Agree	Strongly Agree	Strongly Agree	Strongly Agree	Agree	Strongly Agree	Agree	Agree	Strongly Agree	Agree
159	Agree	Neutral	Strongly Agree	Strongly Agree	Strongly Agree	Strongly Agree	Strongly Agree	Agree	Agree	Agree	Strongly Agree	Strongly Agree	Strongly Agree	Strongly Agree	Agree	Strongly Agree	Strongly Agree
160	Agree	Disagree	Neutral	Agree	Neutral	Strongly Agree	Strongly Agree	Neutral	Strongly Disagree	Strongly Disagree	Neutral	Neutral	Neutral	Neutral	Neutral	Agree	Agree
161	Agree	Neutral	Neutral	Neutral	Agree	Strongly Disagree	Neutral	Disagree	Disagree	Strongly Disagree	Neutral	Strongly Disagree	Neutral	Neutral	Disagree	Agree	Strongly Agree
162	Agree	Agree	Agree	Agree	Agree	Agree	Strongly Agree	Agree	Agree	Strongly Agree	Strongly Agree	Strongly Agree	Agree	Strongly Agree	Strongly Agree	Agree	Strongly Agree
163	Strongly Agree	Strongly Agree	Strongly Agree	Strongly Agree	Strongly Agree	Agree	Agree	Agree	Strongly Agree	Neutral	Agree	Agree	Agree	Agree	Strongly Agree	Strongly Agree	Strongly Agree
164	Agree	Agree	Disagree	Agree	Agree	Strongly Agree	Agree	Agree	Agree	Strongly Agree	Agree	Agree	Neutral	Agree	Neutral	Agree	Strongly Agree
165	Neutral	Agree	Neutral	Neutral	Disagree	Neutral	Agree	Agree	Agree	Strongly Agree	Neutral	Neutral	Agree	Neutral	Neutral	Strongly Agree	Strongly Agree
166	Strongly Agree	Strongly Agree	Strongly Agree	Strongly Agree	Strongly Agree	Strongly Agree	Strongly Agree	Strongly Agree	Strongly Agree	Strongly Agree	Neutral	Neutral	Agree	Neutral	Agree	Strongly Agree	Strongly Agree
167	Neutral	Disagree	Strongly Disagree	Disagree	Disagree	Agree	Strongly Agree	Strongly Agree	Strongly Agree	Strongly Agree	Neutral	Agree	Agree	Agree	Agree	Agree	Strongly Agree
168	Neutral	Neutral	Disagree	Neutral	Agree	Agree	Disagree	Agree	Agree	Strongly Agree	Neutral	Neutral	Disagree	Disagree	Agree	Neutral	Agree
169	Agree	Agree	Strongly Agree	Strongly Agree	Agree	Strongly Agree	Agree	Neutral	Neutral	Agree	Disagree	Strongly Disagree	Disagree	Strongly Disagree	Disagree	Strongly Agree	Strongly Agree
170	Neutral	Neutral	Disagree	Disagree	Strongly Disagree	Agree	Agree	Disagree	Disagree	Neutral	Strongly Disagree	Neutral	Disagree	Neutral	Disagree	Agree	Agree
171	Strongly Disagree	Neutral	Disagree	Disagree	Strongly Disagree	Agree	Agree	Strongly Disagree	Disagree	Neutral	Strongly Disagree	Strongly Disagree	Neutral	Neutral	Disagree	Disagree	Agree
172	Strongly Agree	Strongly Agree	Agree	Strongly Agree	Strongly Agree	Strongly Agree	Agree	Strongly Agree	Agree	Agree	Neutral	Agree	Strongly Disagree	Disagree	Agree	Neutral	Strongly Disagree
173	Neutral	Agree	Disagree	Neutral	Agree	Neutral	Agree	Strongly Agree	Strongly Agree	Strongly Agree	Agree	Strongly Agree	Strongly Agree	Strongly Agree	Agree	Disagree	Neutral
174	Agree	Strongly Agree	Strongly Agree	Agree	Agree	Neutral	Agree	Agree	Agree	Agree	Strongly Agree	Agree	Agree	Strongly Agree	Agree	Agree	Strongly Agree
175	Disagree	Neutral	Strongly Disagree	Strongly Disagree	Disagree	Disagree	Disagree	Neutral	Neutral	Agree	Neutral	Neutral	Neutral	Neutral	Agree	Neutral	Neutral
176	Agree	Agree	Agree	Agree	Disagree	Disagree	Strongly Disagree	Agree	Strongly Agree	Neutral	Disagree	Neutral	Neutral	Neutral	Disagree	Neutral	Disagree
177	Strongly Agree	Strongly Agree	Agree	Agree	Agree	Strongly Agree	Strongly Agree	Strongly Agree	Strongly Agree	Strongly Agree	Strongly Agree	Strongly Agree	Strongly Agree	Agree	Strongly Agree	Strongly Agree	Strongly Agree
178	Disagree	Strongly Disagree	Neutral	Disagree	Strongly Disagree	Neutral	Neutral	Agree	Strongly Agree	Agree	Agree	Neutral	Agree	Neutral	Neutral	Strongly Agree	Strongly Agree
179	Agree	Agree	Strongly Agree	Agree	Agree	Neutral	Agree	Neutral	Disagree	Agree	Strongly Agree	Agree	Agree	Agree	Agree	Strongly Agree	Agree
180	Agree	Strongly Agree	Strongly Agree	Agree	Agree	Agree	Agree	Agree	Strongly Agree	Agree	Neutral	Neutral	Agree	Agree	Agree	Strongly Agree	Strongly Agree
181	Strongly Disagree	Strongly Disagree	Disagree	Strongly Disagree	Disagree	Neutral	Agree	Strongly Disagree	Strongly Disagree	Disagree	Disagree	Neutral	Neutral	Disagree	Neutral	Strongly Disagree	Disagree
182	Neutral	Agree	Neutral	Neutral	Agree	Neutral	Agree	Agree	Agree	Agree	Strongly Disagree	Strongly Disagree	Strongly Disagree	Neutral	Disagree	Strongly Agree	Agree
183	Agree	Neutral	Agree	Agree	Neutral	Agree	Strongly Agree	Agree	Agree	Neutral	Agree	Neutral	Neutral	Agree	Neutral	Agree	Neutral
184	Strongly Agree	Strongly Agree	Strongly Agree	Strongly Agree	Strongly Agree	Neutral	Disagree	Disagree	Neutral	Agree	Agree	Neutral	Neutral	Agree	Agree	Strongly Agree	Strongly Agree
185	Strongly Agree	Strongly Agree	Agree	Agree	Strongly Agree	Disagree	Neutral	Neutral	Neutral	Strongly Disagree	Strongly Agree	Strongly Agree	Strongly Agree	Strongly Agree	Strongly Agree	Agree	Strongly Agree
186	Strongly Agree	Agree	Strongly Agree	Strongly Agree	Strongly Agree	Disagree	Neutral	Agree	Strongly Agree	Strongly Agree	Neutral	Agree	Neutral	Disagree	Neutral	Neutral	Disagree
187	Strongly Agree	Strongly Agree	Strongly Agree	Agree	Agree	Strongly Agree	Strongly Agree	Strongly Agree	Strongly Agree	Strongly Agree	Strongly Agree	Agree	Strongly Agree	Agree	Agree	Strongly Agree	Strongly Agree
188	Agree	Agree	Neutral	Agree	Neutral	Strongly Agree	Strongly Agree	Strongly Agree	Strongly Agree	Agree	Agree	Neutral	Agree	Agree	Neutral	Strongly Agree	Strongly Agree
189	Agree	Agree	Neutral	Agree	Neutral	Agree	Agree	Agree	Strongly Agree	Neutral	Disagree	Neutral	Disagree	Disagree	Disagree	Disagree	Strongly Disagree
190	Agree	Agree	Agree	Neutral	Agree	Neutral	Disagree	Strongly Agree	Strongly Agree	Strongly Agree	Strongly Disagree	Disagree	Neutral	Disagree	Neutral	Strongly Agree	Strongly Agree
191	Strongly Agree	Agree	Strongly Agree	Strongly Agree	Strongly Agree	Agree	Agree	Strongly Agree	Strongly Agree	Strongly Agree	Agree	Neutral	Neutral	Strongly Agree	Neutral	Strongly Agree	Strongly Agree
192	Disagree	Disagree	Neutral	Agree	Disagree	Neutral	Neutral	Disagree	Strongly Disagree	Neutral	Agree	Agree	Agree	Neutral	Agree	Agree	Agree
193	Strongly Disagree	Strongly Disagree	Neutral	Neutral	Neutral	Neutral	Neutral	Agree	Agree	Strongly Agree	Disagree	Disagree	Strongly Disagree	Neutral	Neutral	Agree	Disagree
194	Neutral	Disagree	Disagree	Agree	Agree	Neutral	Neutral	Neutral	Agree	Neutral	Agree	Neutral	Agree	Agree	Neutral	Disagree	Disagree
195	Strongly Agree	Strongly Agree	Strongly Agree	Strongly Agree	Strongly Agree	Agree	Agree	Agree	Neutral	Agree	Neutral	Neutral	Agree	Neutral	Neutral	Agree	Agree
196	Strongly Disagree	Neutral	Disagree	Neutral	Strongly Disagree	Strongly Agree	Strongly Agree	Agree	Agree	Strongly Agree	Agree	Agree	Agree	Agree	Agree	Neutral	Neutral
197	Disagree	Disagree	Neutral	Disagree	Strongly Disagree	Neutral	Agree	Disagree	Neutral	Disagree	Strongly Disagree	Strongly Disagree	Strongly Disagree	Strongly Disagree	Neutral	Agree	Neutral
198	Agree	Strongly Agree	Strongly Agree	Agree	Strongly Agree	Agree	Strongly Agree	Neutral	Agree	Agree	Disagree	Disagree	Neutral	Neutral	Neutral	Strongly Agree	Strongly Agree
199	Agree	Strongly Agree	Agree	Neutral	Agree	Neutral	Agree	Neutral	Disagree	Strongly Disagree	Neutral	Strongly Disagree	Neutral	Neutral	Neutral	Agree	Agree
200	Agree	Agree	Strongly Agree	Agree	Strongly Agree	Strongly Agree	Strongly Agree	Strongly Agree	Strongly Agree	Strongly Agree	Strongly Agree	Strongly Agree	Strongly Agree	Agree	Strongly Agree	Strongly Agree	Strongly Agree
201	Agree	Agree	Agree	Agree	Agree	Agree	Disagree	Neutral	Neutral	Agree	Disagree	Neutral	Agree	Strongly Disagree	Disagree	Neutral	Agree
202	Neutral	Agree	Agree	Neutral	Agree	Disagree	Neutral	Agree	Strongly Agree	Agree	Neutral	Neutral	Disagree	Neutral	Strongly Disagree	Neutral	Agree
203	Strongly Disagree	Disagree	Strongly Disagree	Strongly Disagree	Disagree	Agree	Agree	Strongly Disagree	Disagree	Neutral	Agree	Agree	Agree	Neutral	Agree	Disagree	Disagree
204	Strongly Agree	Strongly Agree	Strongly Agree	Agree	Agree	Disagree	Disagree	Neutral	Neutral	Agree	Agree	Agree	Neutral	Neutral	Agree	Disagree	Disagree
205	Strongly Agree	Strongly Agree	Strongly Agree	Strongly Agree	Strongly Agree	Agree	Strongly Agree	Agree	Strongly Agree	Agree	Agree	Neutral	Neutral	Neutral	Agree	Agree	Neutral
206	Strongly Agree	Strongly Agree	Strongly Agree	Strongly Agree	Strongly Agree	Strongly Agree	Strongly Agree	Neutral	Disagree	Neutral	Neutral	Neutral	Agree	Agree	Disagree	Agree	Neutral
207	Strongly Agree	Strongly Agree	Strongly Agree	Strongly Agree	Strongly Agree	Agree	Neutral	Strongly Agree	Strongly Agree	Strongly Agree	Neutral	Agree	Agree	Neutral	Neutral	Strongly Agree	Strongly Agree
208	Agree	Agree	Strongly Agree	Agree	Neutral	Strongly Agree	Strongly Agree	Strongly Agree	Strongly Agree	Agree	Agree	Strongly Agree	Strongly Agree	Strongly Agree	Neutral	Strongly Agree	Strongly Agree
209	Neutral	Neutral	Agree	Agree	Neutral	Strongly Agree	Strongly Agree	Neutral	Neutral	Agree	Neutral	Neutral	Strongly Disagree	Disagree	Strongly Disagree	Agree	Agree
210	Neutral	Agree	Agree	Agree	Neutral	Neutral	Agree	Strongly Disagree	Disagree	Neutral	Disagree	Strongly Disagree	Disagree	Disagree	Disagree	Agree	Agree
211	Disagree	Neutral	Agree	Neutral	Neutral	Neutral	Strongly Disagree	Strongly Disagree	Neutral	Strongly Disagree	Agree	Agree	Strongly Agree	Neutral	Strongly Agree	Agree	Strongly Agree
212	Agree	Neutral	Agree	Neutral	Strongly Agree	Neutral	Agree	Strongly Agree	Strongly Agree	Strongly Agree	Agree	Agree	Agree	Neutral	Strongly Agree	Strongly Agree	Strongly Agree
213	Neutral	Disagree	Disagree	Neutral	Agree	Disagree	Strongly Disagree	Strongly Disagree	Neutral	Strongly Disagree	Neutral	Neutral	Neutral	Agree	Agree	Neutral	Disagree
214	Strongly Agree	Strongly Agree	Strongly Agree	Strongly Agree	Strongly Agree	Agree	Strongly Agree	Agree	Neutral	Neutral	Agree	Neutral	Agree	Strongly Agree	Agree	Agree	Neutral
215	Neutral	Disagree	Neutral	Disagree	Agree	Disagree	Agree	Strongly Disagree	Neutral	Disagree	Neutral	Disagree	Neutral	Neutral	Neutral	Neutral	Strongly Disagree
216	Agree	Strongly Agree	Agree	Neutral	Strongly Agree	Agree	Agree	Agree	Neutral	Strongly Agree	Strongly Agree	Strongly Agree	Agree	Strongly Agree	Agree	Strongly Agree	Strongly Agree
217	Strongly Agree	Strongly Agree	Strongly Agree	Strongly Agree	Agree	Strongly Agree	Agree	Agree	Agree	Neutral	Neutral	Agree	Neutral	Agree	Agree	Agree	Neutral
218	Agree	Strongly Agree	Agree	Strongly Agree	Strongly Agree	Neutral	Agree	Neutral	Neutral	Agree	Strongly Agree	Agree	Agree	Agree	Strongly Agree	Neutral	Agree
219	Strongly Agree	Strongly Agree	Strongly Agree	Agree	Strongly Agree	Neutral	Agree	Disagree	Neutral	Neutral	Neutral	Disagree	Strongly Disagree	Agree	Agree	Agree	Strongly Agree
220	Neutral	Neutral	Disagree	Disagree	Strongly Disagree	Agree	Strongly Agree	Strongly Disagree	Neutral	Neutral	Agree	Agree	Agree	Strongly Agree	Agree	Strongly Agree	Strongly Agree
221	Agree	Agree	Agree	Neutral	Agree	Disagree	Agree	Disagree	Strongly Disagree	Neutral	Neutral	Neutral	Neutral	Neutral	Neutral	Agree	Strongly Agree
222	Agree	Agree	Agree	Agree	Agree	Strongly Agree	Agree	Agree	Agree	Agree	Neutral	Neutral	Strongly Disagree	Neutral	Neutral	Strongly Agree	Strongly Agree
223	Strongly Agree	Strongly Agree	Strongly Agree	Strongly Agree	Strongly Agree	Strongly Agree	Strongly Agree	Agree	Neutral	Agree	Strongly Agree	Strongly Agree	Agree	Strongly Agree	Strongly Agree	Agree	Neutral
224	Strongly Disagree	Disagree	Neutral	Strongly Disagree	Disagree	Agree	Neutral	Agree	Neutral	Agree	Neutral	Neutral	Neutral	Neutral	Neutral	Strongly Disagree	Disagree
225	Neutral	Neutral	Disagree	Agree	Neutral	Agree	Agree	Disagree	Disagree	Neutral	Agree	Agree	Neutral	Neutral	Agree	Agree	Strongly Agree
226	Strongly Agree	Agree	Strongly Agree	Agree	Agree	Neutral	Disagree	Neutral	Strongly Disagree	Agree	Agree	Strongly Agree	Agree	Strongly Agree	Agree	Agree	Agree
227	Strongly Agree	Agree	Strongly Agree	Agree	Strongly Agree	Strongly Agree	Strongly Agree	Strongly Agree	Strongly Agree	Agree	Neutral	Disagree	Agree	Agree	Agree	Strongly Agree	Agree
228	Agree	Strongly Agree	Agree	Strongly Agree	Strongly Agree	Strongly Agree	Strongly Agree	Agree	Agree	Strongly Agree	Agree	Neutral	Agree	Agree	Agree	Strongly Agree	Agree
229	Neutral	Agree	Agree	Disagree	Agree	Agree	Strongly Agree	Agree	Neutral	Agree	Agree	Strongly Agree	Agree	Agree	Agree	Strongly Agree	Agree
230	Agree	Agree	Strongly Agree	Neutral	Neutral	Neutral	Agree	Neutral	Agree	Neutral	Agree	Neutral	Agree	Agree	Neutral	Disagree	Strongly Disagree
231	Strongly Agree	Strongly Agree	Agree	Strongly Agree	Agree	Agree	Agree	Strongly Agree	Agree	Strongly Agree	Agree	Agree	Agree	Agree	Agree	Strongly Agree	Agree
232	Agree	Neutral	Strongly Agree	Strongly Agree	Neutral	Agree	Agree	Neutral	Disagree	Agree	Agree	Agree	Neutral	Neutral	Neutral	Disagree	Disagree
233	Strongly Disagree	Disagree	Neutral	Disagree	Neutral	Agree	Agree	Agree	Neutral	Agree	Neutral	Agree	Disagree	Disagree	Strongly Disagree	Agree	Agree
234	Agree	Agree	Agree	Agree	Agree	Neutral	Agree	Strongly Agree	Strongly Agree	Strongly Agree	Neutral	Agree	Disagree	Neutral	Neutral	Disagree	Neutral
235	Agree	Agree	Disagree	Agree	Agree	Agree	Disagree	Disagree	Disagree	Neutral	Strongly Disagree	Strongly Disagree	Strongly Disagree	Neutral	Neutral	Disagree	Agree
236	Neutral	Agree	Neutral	Agree	Agree	Neutral	Agree	Neutral	Strongly Disagree	Disagree	Neutral	Agree	Neutral	Neutral	Disagree	Disagree	Disagree
237	Agree	Neutral	Neutral	Strongly Agree	Agree	Neutral	Neutral	Agree	Neutral	Strongly Agree	Disagree	Neutral	Neutral	Neutral	Neutral	Neutral	Agree
238	Agree	Agree	Agree	Disagree	Strongly Agree	Disagree	Neutral	Neutral	Disagree	Neutral	Neutral	Agree	Neutral	Agree	Neutral	Strongly Disagree	Neutral
239	Strongly Agree	Strongly Agree	Strongly Agree	Agree	Strongly Agree	Strongly Agree	Strongly Agree	Neutral	Neutral	Agree	Neutral	Disagree	Agree	Agree	Neutral	Agree	Neutral
240	Strongly Agree	Strongly Agree	Strongly Agree	Strongly Agree	Strongly Agree	Strongly Agree	Strongly Agree	Strongly Agree	Strongly Agree	Agree	Strongly Agree	Strongly Agree	Strongly Agree	Strongly Agree	Agree	Strongly Agree	Strongly Agree
241	Agree	Strongly Agree	Agree	Agree	Agree	Agree	Neutral	Agree	Strongly Agree	Agree	Disagree	Neutral	Neutral	Neutral	Strongly Disagree	Agree	Agree
242	Agree	Agree	Agree	Agree	Agree	Strongly Agree	Strongly Agree	Strongly Agree	Strongly Agree	Strongly Agree	Strongly Agree	Strongly Agree	Agree	Strongly Agree	Agree	Strongly Agree	Strongly Agree
243	Strongly Agree	Strongly Agree	Strongly Agree	Strongly Agree	Agree	Strongly Agree	Strongly Agree	Strongly Disagree	Disagree	Disagree	Neutral	Disagree	Disagree	Neutral	Neutral	Disagree	Neutral
244	Strongly Agree	Strongly Agree	Agree	Strongly Agree	Agree	Strongly Disagree	Disagree	Strongly Agree	Strongly Agree	Agree	Agree	Agree	Agree	Neutral	Strongly Agree	Strongly Agree	Agree
245	Agree	Strongly Agree	Agree	Agree	Neutral	Strongly Agree	Agree	Strongly Agree	Strongly Agree	Strongly Agree	Strongly Agree	Agree	Strongly Agree	Strongly Agree	Agree	Strongly Agree	Strongly Agree
246	Strongly Agree	Agree	Strongly Agree	Strongly Agree	Agree	Agree	Strongly Agree	Strongly Agree	Strongly Agree	Agree	Strongly Agree	Strongly Agree	Agree	Agree	Strongly Agree	Agree	Agree
247	Agree	Strongly Agree	Neutral	Strongly Agree	Strongly Agree	Strongly Agree	Agree	Neutral	Agree	Neutral	Neutral	Strongly Disagree	Neutral	Disagree	Neutral	Strongly Agree	Strongly Agree
248	Disagree	Agree	Neutral	Neutral	Neutral	Agree	Agree	Strongly Agree	Strongly Agree	Strongly Agree	Neutral	Strongly Disagree	Disagree	Neutral	Agree	Strongly Agree	Strongly Agree
249	Disagree	Disagree	Neutral	Neutral	Disagree	Agree	Agree	Strongly Agree	Strongly Agree	Strongly Agree	Neutral	Strongly Disagree	Agree	Disagree	Agree	Agree	Neutral
250	Neutral	Neutral	Agree	Neutral	Neutral	Agree	Neutral	Neutral	Neutral	Agree	Disagree	Disagree	Neutral	Disagree	Neutral	Agree	Neutral
251	Strongly Agree	Strongly Agree	Strongly Agree	Strongly Agree	Strongly Agree	Strongly Agree	Strongly Agree	Strongly Agree	Agree	Strongly Agree	Agree	Neutral	Neutral	Agree	Neutral	Strongly Agree	Strongly Agree
252	Agree	Strongly Agree	Strongly Agree	Neutral	Agree	Neutral	Neutral	Neutral	Disagree	Strongly Disagree	Agree	Agree	Agree	Agree	Agree	Strongly Agree	Agree
253	Agree	Disagree	Disagree	Agree	Strongly Agree	Disagree	Disagree	Neutral	Neutral	Neutral	Agree	Agree	Neutral	Neutral	Neutral	Neutral	Agree
254	Agree	Agree	Neutral	Neutral	Neutral	Strongly Agree	Strongly Agree	Agree	Neutral	Neutral	Strongly Agree	Agree	Strongly Agree	Strongly Agree	Strongly Agree	Agree	Strongly Agree
255	Agree	Agree	Strongly Agree	Agree	Agree	Disagree	Disagree	Strongly Agree	Strongly Agree	Strongly Agree	Disagree	Disagree	Disagree	Neutral	Strongly Disagree	Agree	Neutral
256	Neutral	Disagree	Neutral	Strongly Disagree	Strongly Disagree	Disagree	Strongly Disagree	Neutral	Neutral	Neutral	Agree	Neutral	Neutral	Neutral	Agree	Neutral	Neutral
257	Strongly Agree	Strongly Agree	Strongly Agree	Agree	Agree	Strongly Agree	Strongly Agree	Agree	Agree	Agree	Strongly Agree	Strongly Agree	Strongly Agree	Strongly Agree	Strongly Agree	Strongly Agree	Agree
258	Strongly Agree	Agree	Agree	Strongly Agree	Strongly Agree	Neutral	Agree	Strongly Agree	Strongly Agree	Agree	Agree	Agree	Strongly Agree	Agree	Strongly Agree	Agree	Strongly Agree
259	Neutral	Agree	Strongly Disagree	Agree	Neutral	Strongly Agree	Strongly Agree	Strongly Agree	Strongly Agree	Strongly Agree	Strongly Agree	Agree	Agree	Agree	Agree	Agree	Agree
260	Strongly Agree	Strongly Agree	Strongly Agree	Strongly Agree	Agree	Strongly Agree	Strongly Agree	Agree	Neutral	Strongly Agree	Agree	Strongly Agree	Agree	Agree	Neutral	Agree	Strongly Agree
261	Strongly Agree	Agree	Strongly Agree	Strongly Agree	Strongly Agree	Strongly Agree	Strongly Agree	Strongly Agree	Strongly Agree	Strongly Agree	Strongly Agree	Strongly Agree	Strongly Agree	Strongly Agree	Strongly Agree	Strongly Agree	Agree
262	Strongly Agree	Strongly Agree	Strongly Agree	Strongly Agree	Strongly Agree	Strongly Agree	Strongly Agree	Strongly Agree	Strongly Agree	Strongly Agree	Agree	Strongly Agree	Agree	Strongly Agree	Agree	Strongly Agree	Strongly Agree
263	Neutral	Agree	Neutral	Neutral	Neutral	Neutral	Neutral	Neutral	Disagree	Strongly Disagree	Neutral	Neutral	Agree	Agree	Agree	Strongly Disagree	Strongly Disagree
264	Strongly Agree	Strongly Agree	Strongly Agree	Strongly Agree	Strongly Agree	Neutral	Neutral	Strongly Agree	Strongly Agree	Strongly Agree	Agree	Agree	Neutral	Neutral	Neutral	Agree	Neutral
265	Agree	Neutral	Agree	Neutral	Strongly Agree	Strongly Agree	Strongly Agree	Agree	Strongly Agree	Agree	Neutral	Agree	Agree	Neutral	Agree	Strongly Agree	Strongly Agree
266	Strongly Disagree	Neutral	Strongly Disagree	Strongly Disagree	Neutral	Agree	Agree	Disagree	Disagree	Neutral	Neutral	Neutral	Neutral	Neutral	Neutral	Neutral	Disagree
267	Strongly Agree	Strongly Agree	Agree	Strongly Agree	Strongly Agree	Strongly Agree	Strongly Agree	Agree	Neutral	Agree	Agree	Strongly Agree	Neutral	Strongly Agree	Agree	Strongly Agree	Strongly Agree
268	Agree	Agree	Agree	Agree	Agree	Agree	Neutral	Agree	Strongly Agree	Agree	Neutral	Neutral	Neutral	Strongly Disagree	Disagree	Strongly Agree	Strongly Agree
269	Disagree	Neutral	Neutral	Neutral	Disagree	Neutral	Strongly Disagree	Neutral	Neutral	Disagree	Neutral	Disagree	Strongly Disagree	Neutral	Neutral	Disagree	Strongly Disagree
270	Agree	Neutral	Agree	Strongly Agree	Agree	Strongly Agree	Strongly Agree	Agree	Strongly Agree	Agree	Agree	Agree	Strongly Agree	Agree	Agree	Neutral	Disagree
271	Strongly Agree	Strongly Agree	Agree	Agree	Agree	Strongly Agree	Agree	Strongly Agree	Strongly Agree	Strongly Agree	Agree	Strongly Agree	Neutral	Agree	Agree	Strongly Agree	Strongly Agree
272	Disagree	Neutral	Neutral	Disagree	Strongly Disagree	Strongly Disagree	Disagree	Neutral	Disagree	Agree	Strongly Disagree	Neutral	Disagree	Neutral	Neutral	Strongly Disagree	Neutral
273	Agree	Strongly Agree	Agree	Agree	Agree	Strongly Agree	Strongly Agree	Agree	Agree	Neutral	Neutral	Agree	Disagree	Neutral	Agree	Strongly Agree	Strongly Agree
274	Disagree	Disagree	Neutral	Neutral	Neutral	Neutral	Strongly Disagree	Disagree	Neutral	Disagree	Disagree	Neutral	Neutral	Neutral	Neutral	Agree	Agree
275	Strongly Agree	Agree	Agree	Strongly Agree	Strongly Agree	Agree	Agree	Agree	Agree	Neutral	Strongly Disagree	Disagree	Disagree	Neutral	Disagree	Strongly Agree	Agree
276	Strongly Agree	Agree	Strongly Agree	Agree	Strongly Agree	Strongly Agree	Strongly Agree	Strongly Agree	Strongly Agree	Neutral	Strongly Agree	Agree	Agree	Agree	Strongly Agree	Agree	Strongly Agree
277	Strongly Agree	Strongly Agree	Strongly Agree	Agree	Strongly Agree	Strongly Agree	Strongly Agree	Strongly Agree	Strongly Agree	Strongly Agree	Strongly Agree	Strongly Agree	Agree	Agree	Agree	Strongly Agree	Strongly Agree
278	Strongly Agree	Strongly Agree	Agree	Agree	Agree	Agree	Agree	Strongly Agree	Strongly Agree	Strongly Agree	Strongly Agree	Strongly Agree	Strongly Agree	Agree	Strongly Agree	Strongly Agree	Strongly Agree
279	Strongly Agree	Agree	Strongly Agree	Strongly Agree	Strongly Agree	Strongly Agree	Agree	Strongly Agree	Strongly Agree	Strongly Agree	Strongly Agree	Strongly Agree	Agree	Agree	Strongly Agree	Strongly Agree	Strongly Agree
280	Agree	Neutral	Agree	Agree	Agree	Agree	Strongly Agree	Agree	Agree	Agree	Agree	Agree	Strongly Agree	Agree	Strongly Agree	Agree	Strongly Agree
281	Disagree	Agree	Neutral	Disagree	Strongly Disagree	Neutral	Neutral	Disagree	Strongly Disagree	Strongly Disagree	Strongly Disagree	Strongly Disagree	Disagree	Neutral	Neutral	Neutral	Agree
282	Strongly Agree	Strongly Agree	Strongly Agree	Strongly Agree	Strongly Agree	Agree	Agree	Strongly Agree	Strongly Agree	Strongly Agree	Agree	Strongly Agree	Strongly Agree	Strongly Agree	Agree	Agree	Neutral
283	Agree	Agree	Strongly Agree	Agree	Agree	Strongly Agree	Strongly Agree	Agree	Agree	Strongly Agree	Agree	Neutral	Agree	Strongly Agree	Agree	Strongly Agree	Strongly Agree
284	Agree	Agree	Agree	Strongly Agree	Strongly Agree	Disagree	Neutral	Agree	Agree	Agree	Disagree	Neutral	Strongly Disagree	Strongly Disagree	Strongly Disagree	Agree	Neutral
285	Agree	Strongly Agree	Neutral	Strongly Agree	Agree	Strongly Agree	Strongly Agree	Agree	Agree	Neutral	Neutral	Neutral	Strongly Disagree	Strongly Disagree	Agree	Disagree	Neutral
286	Strongly Agree	Strongly Agree	Strongly Agree	Strongly Agree	Strongly Agree	Strongly Agree	Strongly Agree	Agree	Agree	Agree	Agree	Strongly Agree	Strongly Agree	Agree	Agree	Agree	Agree
287	Agree	Agree	Agree	Agree	Agree	Neutral	Strongly Disagree	Strongly Disagree	Disagree	Strongly Disagree	Strongly Disagree	Disagree	Disagree	Disagree	Neutral	Neutral	Strongly Disagree
288	Agree	Strongly Agree	Strongly Agree	Agree	Agree	Strongly Agree	Strongly Agree	Neutral	Disagree	Agree	Strongly Agree	Agree	Agree	Agree	Strongly Agree	Strongly Agree	Agree
289	Agree	Neutral	Strongly Agree	Strongly Agree	Neutral	Strongly Agree	Agree	Strongly Agree	Strongly Agree	Agree	Strongly Agree	Agree	Strongly Agree	Agree	Agree	Strongly Agree	Strongly Agree
290	Strongly Disagree	Neutral	Disagree	Strongly Disagree	Neutral	Agree	Agree	Neutral	Agree	Disagree	Strongly Disagree	Strongly Disagree	Neutral	Neutral	Disagree	Strongly Disagree	Disagree
291	Strongly Agree	Strongly Agree	Strongly Agree	Strongly Agree	Strongly Agree	Agree	Agree	Strongly Agree	Agree	Agree	Strongly Agree	Strongly Agree	Agree	Agree	Agree	Strongly Agree	Strongly Agree
292	Strongly Disagree	Disagree	Strongly Disagree	Strongly Disagree	Disagree	Agree	Agree	Neutral	Neutral	Agree	Disagree	Neutral	Disagree	Strongly Disagree	Neutral	Agree	Neutral
293	Agree	Strongly Agree	Agree	Agree	Agree	Agree	Strongly Agree	Neutral	Disagree	Neutral	Disagree	Neutral	Strongly Disagree	Strongly Disagree	Disagree	Agree	Agree
294	Agree	Strongly Agree	Strongly Agree	Strongly Agree	Neutral	Agree	Neutral	Neutral	Strongly Disagree	Neutral	Neutral	Agree	Agree	Neutral	Agree	Strongly Agree	Strongly Agree
295	Strongly Agree	Strongly Agree	Strongly Agree	Strongly Agree	Strongly Agree	Strongly Agree	Agree	Strongly Agree	Strongly Agree	Strongly Agree	Strongly Agree	Agree	Strongly Agree	Strongly Agree	Agree	Strongly Agree	Agree
296	Agree	Agree	Neutral	Agree	Neutral	Strongly Agree	Strongly Agree	Strongly Agree	Strongly Agree	Strongly Agree	Agree	Agree	Agree	Strongly Agree	Strongly Agree	Agree	Neutral
297	Disagree	Disagree	Neutral	Neutral	Neutral	Neutral	Disagree	Neutral	Neutral	Agree	Neutral	Agree	Neutral	Neutral	Neutral	Neutral	Disagree
298	Strongly Agree	Strongly Agree	Strongly Agree	Strongly Agree	Strongly Agree	Strongly Agree	Strongly Agree	Strongly Agree	Strongly Agree	Agree	Strongly Agree	Strongly Agree	Strongly Agree	Agree	Strongly Agree	Strongly Agree	Strongly Agree
299	Strongly Agree	Strongly Agree	Strongly Agree	Agree	Strongly Agree	Strongly Agree	Strongly Agree	Strongly Agree	Strongly Agree	Agree	Strongly Agree	Strongly Agree	Agree	Agree	Strongly Agree	Strongly Agree	Strongly Agree
300	Strongly Agree	Strongly Agree	Strongly Agree	Strongly Agree	Strongly Agree	Disagree	Strongly Disagree	Strongly Disagree	Neutral	Disagree	Agree	Neutral	Neutral	Neutral	Neutral	Strongly Agree	Strongly Agree
301	Agree	Disagree	Disagree	Neutral	Neutral	Strongly Disagree	Strongly Disagree	Disagree	Disagree	Neutral	Strongly Disagree	Strongly Disagree	Neutral	Disagree	Disagree	Disagree	Agree
302	Strongly Agree	Strongly Agree	Strongly Agree	Strongly Agree	Strongly Agree	Strongly Agree	Agree	Neutral	Disagree	Agree	Agree	Agree	Agree	Agree	Neutral	Strongly Agree	Agree
303	Strongly Agree	Strongly Agree	Strongly Agree	Strongly Agree	Strongly Agree	Strongly Agree	Strongly Agree	Strongly Agree	Strongly Agree	Strongly Agree	Strongly Agree	Strongly Agree	Strongly Agree	Strongly Agree	Strongly Agree	Agree	Agree
304	Neutral	Disagree	Strongly Disagree	Agree	Strongly Disagree	Strongly Agree	Strongly Agree	Strongly Agree	Strongly Agree	Agree	Strongly Agree	Strongly Agree	Strongly Agree	Strongly Agree	Strongly Agree	Strongly Agree	Strongly Agree
305	Agree	Agree	Agree	Neutral	Agree	Strongly Agree	Strongly Agree	Agree	Agree	Strongly Agree	Neutral	Neutral	Neutral	Neutral	Neutral	Agree	Strongly Agree
306	Agree	Strongly Agree	Agree	Agree	Agree	Strongly Agree	Strongly Agree	Strongly Agree	Strongly Agree	Strongly Agree	Agree	Agree	Agree	Agree	Neutral	Strongly Agree	Strongly Agree
307	Disagree	Disagree	Neutral	Agree	Neutral	Agree	Disagree	Agree	Agree	Strongly Agree	Strongly Agree	Agree	Strongly Agree	Strongly Agree	Agree	Agree	Agree
308	Disagree	Strongly Disagree	Neutral	Neutral	Disagree	Disagree	Neutral	Neutral	Neutral	Disagree	Neutral	Strongly Disagree	Disagree	Disagree	Disagree	Strongly Agree	Strongly Agree
309	Strongly Disagree	Strongly Disagree	Disagree	Disagree	Neutral	Disagree	Disagree	Agree	Neutral	Strongly Agree	Neutral	Disagree	Strongly Disagree	Agree	Agree	Neutral	Neutral
310	Neutral	Neutral	Agree	Agree	Agree	Strongly Agree	Strongly Agree	Neutral	Neutral	Agree	Neutral	Neutral	Agree	Neutral	Neutral	Agree	Strongly Agree
311	Agree	Strongly Agree	Strongly Agree	Agree	Agree	Neutral	Disagree	Neutral	Agree	Agree	Neutral	Strongly Disagree	Agree	Neutral	Neutral	Neutral	Disagree
312	Agree	Strongly Agree	Agree	Agree	Strongly Agree	Agree	Agree	Neutral	Neutral	Disagree	Neutral	Neutral	Agree	Disagree	Strongly Disagree	Agree	Strongly Agree
313	Strongly Agree	Strongly Agree	Agree	Agree	Strongly Agree	Strongly Agree	Strongly Agree	Strongly Agree	Strongly Agree	Strongly Agree	Neutral	Disagree	Neutral	Neutral	Neutral	Strongly Agree	Strongly Agree
314	Disagree	Neutral	Agree	Neutral	Disagree	Disagree	Neutral	Disagree	Agree	Neutral	Agree	Strongly Agree	Neutral	Agree	Agree	Disagree	Disagree
315	Strongly Agree	Strongly Agree	Strongly Agree	Strongly Agree	Agree	Strongly Agree	Agree	Strongly Disagree	Neutral	Disagree	Agree	Agree	Agree	Agree	Agree	Strongly Agree	Strongly Agree
316	Strongly Agree	Agree	Strongly Agree	Agree	Strongly Agree	Agree	Agree	Strongly Agree	Agree	Agree	Agree	Agree	Strongly Agree	Neutral	Neutral	Agree	Agree
317	Agree	Strongly Agree	Strongly Agree	Strongly Agree	Agree	Agree	Agree	Neutral	Agree	Agree	Neutral	Agree	Disagree	Strongly Disagree	Agree	Disagree	Strongly Disagree
318	Agree	Agree	Agree	Agree	Strongly Agree	Strongly Agree	Strongly Agree	Strongly Agree	Strongly Agree	Strongly Agree	Agree	Agree	Neutral	Agree	Neutral	Strongly Agree	Agree
319	Strongly Agree	Strongly Agree	Strongly Agree	Strongly Agree	Strongly Agree	Neutral	Disagree	Strongly Agree	Strongly Agree	Strongly Agree	Agree	Neutral	Agree	Agree	Agree	Agree	Agree
320	Strongly Agree	Agree	Strongly Agree	Strongly Agree	Agree	Neutral	Agree	Strongly Agree	Strongly Agree	Agree	Agree	Agree	Agree	Agree	Neutral	Agree	Agree
321	Strongly Agree	Agree	Agree	Agree	Agree	Disagree	Agree	Strongly Agree	Agree	Strongly Agree	Strongly Agree	Agree	Agree	Strongly Agree	Agree	Agree	Strongly Agree
322	Strongly Agree	Strongly Agree	Agree	Agree	Strongly Agree	Agree	Agree	Agree	Neutral	Agree	Agree	Neutral	Agree	Agree	Strongly Agree	Agree	Agree
323	Strongly Agree	Agree	Agree	Strongly Agree	Strongly Agree	Agree	Strongly Agree	Strongly Agree	Strongly Agree	Strongly Agree	Agree	Strongly Agree	Strongly Agree	Strongly Agree	Strongly Agree	Strongly Agree	Agree
324	Strongly Agree	Strongly Agree	Strongly Agree	Strongly Agree	Strongly Agree	Agree	Agree	Strongly Agree	Strongly Agree	Strongly Agree	Agree	Neutral	Neutral	Agree	Agree	Strongly Agree	Strongly Agree
325	Neutral	Neutral	Agree	Disagree	Strongly Disagree	Neutral	Agree	Disagree	Strongly Disagree	Neutral	Neutral	Neutral	Neutral	Disagree	Neutral	Disagree	Strongly Disagree
326	Neutral	Neutral	Strongly Disagree	Strongly Disagree	Neutral	Agree	Strongly Agree	Disagree	Agree	Disagree	Neutral	Neutral	Neutral	Neutral	Agree	Neutral	Agree
327	Agree	Agree	Agree	Agree	Strongly Agree	Strongly Agree	Strongly Agree	Agree	Neutral	Strongly Agree	Agree	Strongly Agree	Neutral	Strongly Agree	Strongly Agree	Strongly Agree	Strongly Agree
328	Strongly Disagree	Neutral	Neutral	Disagree	Strongly Disagree	Strongly Agree	Strongly Agree	Neutral	Disagree	Agree	Disagree	Neutral	Disagree	Neutral	Neutral	Neutral	Neutral
329	Strongly Agree	Strongly Agree	Strongly Agree	Strongly Agree	Strongly Agree	Strongly Agree	Strongly Agree	Strongly Agree	Agree	Agree	Agree	Agree	Neutral	Strongly Agree	Agree	Strongly Agree	Strongly Agree
330	Strongly Agree	Agree	Strongly Agree	Strongly Agree	Agree	Strongly Agree	Strongly Agree	Strongly Agree	Agree	Strongly Agree	Strongly Agree	Agree	Strongly Agree	Strongly Agree	Agree	Strongly Agree	Agree
331	Strongly Agree	Strongly Agree	Strongly Agree	Strongly Agree	Strongly Agree	Strongly Agree	Agree	Strongly Agree	Strongly Agree	Agree	Agree	Agree	Strongly Agree	Strongly Agree	Strongly Agree	Strongly Agree	Strongly Agree
332	Strongly Agree	Agree	Strongly Agree	Agree	Agree	Strongly Agree	Agree	Agree	Agree	Strongly Agree	Strongly Agree	Agree	Strongly Agree	Strongly Agree	Strongly Agree	Strongly Agree	Agree
333	Agree	Agree	Neutral	Agree	Agree	Disagree	Neutral	Strongly Agree	Strongly Agree	Strongly Agree	Agree	Strongly Agree	Agree	Strongly Agree	Agree	Agree	Neutral
334	Strongly Agree	Agree	Agree	Strongly Agree	Strongly Agree	Agree	Agree	Strongly Agree	Strongly Agree	Strongly Agree	Agree	Agree	Strongly Agree	Agree	Strongly Agree	Agree	Neutral
335	Agree	Agree	Agree	Neutral	Agree	Strongly Agree	Strongly Agree	Neutral	Agree	Neutral	Agree	Agree	Agree	Neutral	Strongly Agree	Strongly Agree	Strongly Agree
336	Agree	Agree	Agree	Agree	Agree	Strongly Agree	Strongly Agree	Strongly Agree	Strongly Agree	Strongly Agree	Strongly Agree	Agree	Agree	Strongly Agree	Agree	Agree	Agree
337	Agree	Disagree	Agree	Agree	Agree	Strongly Agree	Strongly Agree	Neutral	Neutral	Agree	Disagree	Neutral	Neutral	Neutral	Neutral	Disagree	Disagree
338	Agree	Neutral	Strongly Agree	Agree	Neutral	Strongly Agree	Agree	Strongly Agree	Strongly Agree	Strongly Agree	Agree	Agree	Strongly Agree	Neutral	Strongly Agree	Strongly Agree	Strongly Agree
339	Agree	Agree	Neutral	Agree	Strongly Agree	Strongly Agree	Strongly Agree	Neutral	Neutral	Agree	Agree	Agree	Neutral	Agree	Agree	Agree	Strongly Agree
340	Disagree	Neutral	Disagree	Strongly Disagree	Neutral	Strongly Agree	Strongly Agree	Strongly Disagree	Neutral	Strongly Disagree	Disagree	Neutral	Neutral	Disagree	Neutral	Agree	Strongly Agree
341	Neutral	Neutral	Strongly Disagree	Neutral	Disagree	Disagree	Neutral	Strongly Disagree	Neutral	Disagree	Neutral	Neutral	Neutral	Agree	Neutral	Strongly Disagree	Strongly Disagree
342	Strongly Agree	Strongly Agree	Strongly Agree	Strongly Agree	Strongly Agree	Strongly Agree	Strongly Agree	Strongly Agree	Agree	Strongly Agree	Strongly Agree	Strongly Agree	Strongly Agree	Agree	Strongly Agree	Neutral	Agree
343	Strongly Agree	Agree	Strongly Agree	Strongly Agree	Strongly Agree	Strongly Agree	Strongly Agree	Strongly Agree	Strongly Agree	Strongly Agree	Agree	Agree	Strongly Agree	Agree	Agree	Strongly Agree	Strongly Agree
344	Strongly Agree	Strongly Agree	Strongly Agree	Strongly Agree	Strongly Agree	Strongly Agree	Strongly Agree	Agree	Strongly Agree	Strongly Agree	Neutral	Neutral	Neutral	Disagree	Neutral	Strongly Agree	Strongly Agree
345	Strongly Disagree	Neutral	Strongly Disagree	Neutral	Strongly Disagree	Agree	Neutral	Agree	Agree	Agree	Agree	Strongly Agree	Agree	Agree	Agree	Strongly Agree	Strongly Agree
346	Neutral	Neutral	Strongly Disagree	Agree	Neutral	Strongly Agree	Strongly Agree	Neutral	Strongly Disagree	Neutral	Agree	Agree	Agree	Strongly Agree	Neutral	Strongly Agree	Strongly Agree
347	Strongly Disagree	Strongly Disagree	Disagree	Strongly Disagree	Neutral	Strongly Agree	Agree	Strongly Disagree	Strongly Disagree	Neutral	Neutral	Neutral	Neutral	Neutral	Neutral	Agree	Agree
348	Disagree	Neutral	Neutral	Agree	Neutral	Strongly Disagree	Neutral	Strongly Disagree	Disagree	Disagree	Neutral	Disagree	Neutral	Disagree	Strongly Disagree	Agree	Agree
349	Strongly Agree	Strongly Agree	Strongly Agree	Agree	Strongly Agree	Neutral	Neutral	Strongly Agree	Strongly Agree	Strongly Agree	Strongly Agree	Strongly Agree	Strongly Agree	Strongly Agree	Strongly Agree	Strongly Agree	Strongly Agree
350	Agree	Agree	Strongly Agree	Agree	Agree	Strongly Agree	Agree	Neutral	Disagree	Strongly Disagree	Strongly Agree	Strongly Agree	Agree	Strongly Agree	Agree	Agree	Strongly Agree
351	Agree	Agree	Agree	Agree	Agree	Agree	Strongly Agree	Disagree	Disagree	Agree	Agree	Agree	Neutral	Strongly Agree	Agree	Agree	Strongly Agree
352	Neutral	Disagree	Neutral	Agree	Strongly Disagree	Agree	Agree	Agree	Neutral	Strongly Agree	Agree	Agree	Agree	Agree	Agree	Neutral	Strongly Disagree
353	Agree	Agree	Agree	Agree	Strongly Agree	Agree	Strongly Agree	Disagree	Strongly Disagree	Neutral	Disagree	Disagree	Disagree	Strongly Disagree	Neutral	Disagree	Disagree
354	Strongly Agree	Strongly Agree	Strongly Agree	Strongly Agree	Strongly Agree	Agree	Agree	Strongly Agree	Strongly Agree	Strongly Agree	Strongly Agree	Agree	Strongly Agree	Strongly Agree	Strongly Agree	Neutral	Disagree
355	Agree	Strongly Agree	Agree	Neutral	Neutral	Neutral	Neutral	Agree	Neutral	Strongly Agree	Agree	Neutral	Agree	Neutral	Agree	Agree	Neutral
356	Agree	Strongly Agree	Neutral	Agree	Neutral	Strongly Agree	Strongly Agree	Agree	Agree	Strongly Agree	Agree	Strongly Agree	Agree	Agree	Strongly Agree	Agree	Agree
357	Disagree	Strongly Disagree	Disagree	Strongly Disagree	Disagree	Neutral	Strongly Disagree	Strongly Agree	Strongly Agree	Strongly Agree	Neutral	Neutral	Neutral	Agree	Agree	Strongly Agree	Strongly Agree
358	Disagree	Neutral	Disagree	Neutral	Disagree	Agree	Strongly Agree	Agree	Neutral	Strongly Agree	Strongly Disagree	Disagree	Neutral	Strongly Disagree	Disagree	Neutral	Neutral
359	Disagree	Disagree	Disagree	Neutral	Strongly Disagree	Agree	Strongly Agree	Agree	Strongly Agree	Agree	Strongly Agree	Agree	Strongly Agree	Strongly Agree	Agree	Agree	Agree
360	Agree	Disagree	Disagree	Agree	Agree	Agree	Agree	Disagree	Agree	Disagree	Neutral	Neutral	Agree	Agree	Agree	Agree	Agree
361	Strongly Agree	Agree	Strongly Agree	Strongly Agree	Strongly Agree	Strongly Agree	Agree	Agree	Agree	Agree	Agree	Strongly Agree	Strongly Agree	Agree	Strongly Agree	Strongly Agree	Agree
362	Disagree	Strongly Disagree	Neutral	Strongly Disagree	Strongly Disagree	Disagree	Neutral	Agree	Strongly Agree	Neutral	Neutral	Disagree	Neutral	Disagree	Neutral	Disagree	Disagree
363	Neutral	Strongly Disagree	Agree	Neutral	Agree	Agree	Agree	Neutral	Neutral	Neutral	Neutral	Agree	Agree	Agree	Neutral	Agree	Agree
364	Strongly Disagree	Disagree	Disagree	Neutral	Disagree	Neutral	Agree	Neutral	Neutral	Neutral	Neutral	Neutral	Disagree	Neutral	Neutral	Strongly Agree	Strongly Agree
365	Strongly Agree	Strongly Agree	Agree	Strongly Agree	Strongly Agree	Strongly Agree	Agree	Strongly Agree	Agree	Strongly Agree	Strongly Agree	Strongly Agree	Agree	Strongly Agree	Agree	Strongly Agree	Strongly Agree
366	Strongly Agree	Strongly Agree	Strongly Agree	Agree	Strongly Agree	Disagree	Agree	Strongly Agree	Neutral	Strongly Agree	Neutral	Strongly Disagree	Strongly Disagree	Strongly Disagree	Disagree	Agree	Disagree
367	Neutral	Neutral	Neutral	Neutral	Neutral	Agree	Agree	Neutral	Neutral	Neutral	Neutral	Neutral	Agree	Agree	Neutral	Agree	Agree
368	Agree	Neutral	Agree	Neutral	Strongly Agree	Strongly Agree	Strongly Agree	Strongly Agree	Strongly Agree	Strongly Agree	Agree	Neutral	Agree	Agree	Strongly Agree	Agree	Agree
369	Agree	Neutral	Neutral	Agree	Agree	Agree	Agree	Agree	Neutral	Strongly Agree	Agree	Strongly Agree	Agree	Agree	Neutral	Agree	Strongly Agree
370	Strongly Agree	Strongly Agree	Agree	Strongly Agree	Strongly Agree	Strongly Agree	Agree	Agree	Strongly Agree	Agree	Agree	Agree	Agree	Agree	Agree	Strongly Agree	Strongly Agree
371	Strongly Agree	Strongly Agree	Strongly Agree	Agree	Agree	Strongly Agree	Strongly Agree	Strongly Agree	Strongly Agree	Strongly Agree	Strongly Agree	Strongly Agree	Strongly Agree	Agree	Strongly Agree	Strongly Agree	Strongly Agree
372	Agree	Neutral	Strongly Agree	Agree	Agree	Agree	Agree	Disagree	Neutral	Disagree	Neutral	Neutral	Neutral	Neutral	Neutral	Strongly Agree	Strongly Agree
373	Agree	Agree	Neutral	Agree	Neutral	Neutral	Agree	Disagree	Disagree	Disagree	Disagree	Disagree	Neutral	Neutral	Strongly Disagree	Disagree	Neutral
374	Disagree	Agree	Strongly Disagree	Disagree	Neutral	Strongly Agree	Strongly Agree	Strongly Disagree	Neutral	Strongly Disagree	Agree	Strongly Agree	Agree	Agree	Strongly Agree	Agree	Strongly Agree
375	Agree	Neutral	Disagree	Neutral	Neutral	Strongly Agree	Agree	Neutral	Disagree	Agree	Neutral	Disagree	Agree	Agree	Agree	Disagree	Strongly Disagree
376	Strongly Agree	Strongly Agree	Strongly Agree	Strongly Agree	Agree	Strongly Agree	Strongly Agree	Strongly Agree	Strongly Agree	Strongly Agree	Agree	Strongly Agree	Agree	Agree	Neutral	Strongly Agree	Strongly Agree
377	Strongly Agree	Strongly Agree	Strongly Agree	Agree	Strongly Agree	Strongly Agree	Strongly Agree	Strongly Agree	Strongly Agree	Strongly Agree	Strongly Agree	Agree	Agree	Strongly Agree	Strongly Agree	Strongly Agree	Strongly Agree
378	Agree	Strongly Agree	Agree	Strongly Agree	Agree	Strongly Agree	Agree	Strongly Agree	Strongly Agree	Agree	Agree	Strongly Agree	Agree	Agree	Agree	Agree	Agree
379	Strongly Agree	Strongly Agree	Agree	Agree	Strongly Agree	Strongly Agree	Agree	Strongly Agree	Agree	Agree	Strongly Agree	Strongly Agree	Strongly Agree	Strongly Agree	Strongly Agree	Strongly Agree	Strongly Agree
380	Neutral	Disagree	Neutral	Neutral	Disagree	Neutral	Agree	Neutral	Agree	Strongly Disagree	Disagree	Neutral	Strongly Disagree	Disagree	Strongly Disagree	Agree	Strongly Agree
381	Strongly Disagree	Strongly Disagree	Strongly Disagree	Neutral	Neutral	Disagree	Neutral	Neutral	Disagree	Disagree	Disagree	Neutral	Neutral	Neutral	Neutral	Neutral	Strongly Disagree
382	Strongly Agree	Agree	Strongly Agree	Strongly Agree	Agree	Agree	Agree	Strongly Agree	Agree	Agree	Agree	Agree	Strongly Agree	Strongly Agree	Agree	Strongly Agree	Strongly Agree
383	Agree	Agree	Agree	Agree	Agree	Neutral	Agree	Neutral	Neutral	Neutral	Neutral	Neutral	Neutral	Agree	Strongly Disagree	Agree	Strongly Agree
384	Strongly Agree	Strongly Agree	Strongly Agree	Strongly Agree	Agree	Agree	Agree	Neutral	Agree	Neutral	Strongly Agree	Agree	Agree	Strongly Agree	Agree	Strongly Agree	Strongly Agree
385	Neutral	Disagree	Agree	Agree	Neutral	Agree	Agree	Agree	Strongly Agree	Strongly Agree	Strongly Disagree	Neutral	Neutral	Disagree	Neutral	Neutral	Agree
386	Strongly Agree	Strongly Agree	Strongly Agree	Strongly Agree	Strongly Agree	Strongly Agree	Agree	Strongly Agree	Strongly Agree	Strongly Agree	Agree	Strongly Agree	Neutral	Neutral	Agree	Strongly Agree	Strongly Agree
387	Neutral	Agree	Disagree	Disagree	Strongly Disagree	Agree	Agree	Strongly Disagree	Strongly Disagree	Neutral	Strongly Disagree	Disagree	Disagree	Strongly Disagree	Strongly Disagree	Strongly Disagree	Disagree
388	Strongly Agree	Strongly Agree	Strongly Agree	Strongly Agree	Strongly Agree	Strongly Agree	Strongly Agree	Strongly Agree	Strongly Agree	Strongly Agree	Strongly Agree	Strongly Agree	Strongly Agree	Strongly Agree	Agree	Strongly Agree	Agree
389	Strongly Agree	Strongly Agree	Strongly Agree	Agree	Strongly Agree	Strongly Agree	Strongly Agree	Agree	Strongly Agree	Strongly Agree	Disagree	Disagree	Disagree	Neutral	Neutral	Agree	Strongly Agree
390	Strongly Agree	Strongly Agree	Agree	Strongly Agree	Strongly Agree	Strongly Agree	Strongly Agree	Strongly Agree	Strongly Agree	Strongly Agree	Agree	Strongly Agree	Agree	Strongly Agree	Agree	Strongly Agree	Agree
391	Strongly Agree	Strongly Agree	Strongly Agree	Agree	Strongly Agree	Strongly Agree	Strongly Agree	Agree	Neutral	Agree	Disagree	Neutral	Neutral	Neutral	Neutral	Agree	Strongly Agree
392	Agree	Agree	Strongly Agree	Agree	Agree	Neutral	Strongly Disagree	Agree	Strongly Agree	Neutral	Neutral	Strongly Disagree	Strongly Disagree	Disagree	Disagree	Strongly Disagree	Agree
393	Disagree	Strongly Disagree	Neutral	Disagree	Neutral	Strongly Disagree	Neutral	Neutral	Disagree	Strongly Disagree	Disagree	Neutral	Neutral	Neutral	Strongly Disagree	Strongly Disagree	Disagree
394	Neutral	Agree	Agree	Strongly Disagree	Strongly Disagree	Strongly Agree	Strongly Agree	Neutral	Agree	Neutral	Strongly Disagree	Strongly Disagree	Disagree	Neutral	Disagree	Neutral	Agree
395	Agree	Strongly Agree	Strongly Agree	Strongly Agree	Strongly Agree	Neutral	Agree	Strongly Disagree	Neutral	Strongly Disagree	Disagree	Neutral	Strongly Disagree	Neutral	Strongly Disagree	Neutral	Neutral
396	Neutral	Agree	Agree	Neutral	Agree	Agree	Agree	Strongly Agree	Strongly Agree	Agree	Disagree	Neutral	Disagree	Neutral	Neutral	Neutral	Disagree
397	Agree	Agree	Strongly Agree	Strongly Agree	Agree	Strongly Agree	Strongly Agree	Strongly Agree	Strongly Agree	Strongly Agree	Agree	Neutral	Agree	Neutral	Neutral	Agree	Agree
398	Neutral	Neutral	Neutral	Agree	Disagree	Disagree	Strongly Disagree	Strongly Disagree	Strongly Disagree	Disagree	Disagree	Neutral	Disagree	Neutral	Disagree	Neutral	Agree
399	Disagree	Strongly Disagree	Neutral	Neutral	Disagree	Strongly Disagree	Neutral	Neutral	Neutral	Neutral	Neutral	Disagree	Agree	Agree	Neutral	Agree	Agree
400	Strongly Agree	Agree	Strongly Agree	Strongly Agree	Strongly Agree	Strongly Agree	Strongly Agree	Strongly Agree	Strongly Agree	Strongly Agree	Strongly Agree	Strongly Agree	Agree	Strongly Agree	Strongly Agree	Strongly Agree	Strongly Agree
401	Neutral	Disagree	Disagree	Agree	Neutral	Disagree	Strongly Disagree	Neutral	Agree	Strongly Disagree	Neutral	Neutral	Agree	Neutral	Agree	Neutral	Agree
402	Agree	Neutral	Agree	Strongly Agree	Strongly Agree	Agree	Agree	Agree	Neutral	Agree	Neutral	Neutral	Strongly Disagree	Neutral	Agree	Agree	Agree
403	Strongly Agree	Agree	Agree	Strongly Agree	Strongly Agree	Strongly Agree	Agree	Agree	Strongly Agree	Strongly Agree	Agree	Agree	Strongly Agree	Neutral	Agree	Agree	Strongly Agree
404	Neutral	Neutral	Strongly Disagree	Disagree	Disagree	Agree	Strongly Agree	Agree	Neutral	Agree	Agree	Strongly Agree	Agree	Agree	Agree	Neutral	Agree
405	Neutral	Strongly Disagree	Neutral	Disagree	Agree	Agree	Neutral	Strongly Agree	Strongly Agree	Strongly Agree	Agree	Agree	Agree	Neutral	Agree	Strongly Agree	Strongly Agree
406	Disagree	Disagree	Neutral	Neutral	Neutral	Agree	Agree	Agree	Strongly Agree	Neutral	Strongly Agree	Agree	Strongly Agree	Strongly Agree	Strongly Agree	Neutral	Strongly Disagree
407	Agree	Disagree	Agree	Neutral	Agree	Strongly Agree	Strongly Agree	Strongly Agree	Agree	Agree	Neutral	Neutral	Neutral	Disagree	Disagree	Neutral	Neutral
408	Agree	Agree	Agree	Agree	Agree	Strongly Agree	Strongly Agree	Agree	Neutral	Neutral	Agree	Agree	Agree	Agree	Agree	Strongly Agree	Agree
409	Strongly Agree	Strongly Agree	Agree	Strongly Agree	Strongly Agree	Strongly Agree	Strongly Agree	Agree	Neutral	Strongly Agree	Strongly Agree	Strongly Agree	Strongly Agree	Strongly Agree	Agree	Strongly Agree	Strongly Agree
410	Strongly Agree	Strongly Agree	Agree	Agree	Agree	Strongly Agree	Strongly Agree	Neutral	Strongly Disagree	Agree	Strongly Agree	Strongly Agree	Strongly Agree	Strongly Agree	Strongly Agree	Agree	Agree
411	Strongly Agree	Strongly Agree	Strongly Agree	Strongly Agree	Strongly Agree	Strongly Agree	Strongly Agree	Strongly Agree	Agree	Strongly Agree	Neutral	Disagree	Agree	Disagree	Neutral	Strongly Agree	Agree
412	Neutral	Neutral	Agree	Agree	Neutral	Neutral	Strongly Disagree	Neutral	Disagree	Neutral	Disagree	Strongly Disagree	Neutral	Disagree	Strongly Disagree	Neutral	Agree
413	Strongly Agree	Agree	Agree	Agree	Strongly Agree	Strongly Agree	Strongly Agree	Strongly Agree	Strongly Agree	Strongly Agree	Agree	Agree	Strongly Agree	Agree	Agree	Strongly Agree	Strongly Agree
414	Agree	Agree	Agree	Agree	Neutral	Agree	Neutral	Neutral	Agree	Agree	Strongly Agree	Strongly Agree	Strongly Agree	Strongly Agree	Agree	Neutral	Disagree
415	Agree	Agree	Agree	Agree	Strongly Agree	Agree	Agree	Agree	Agree	Neutral	Neutral	Disagree	Agree	Agree	Disagree	Agree	Neutral
416	Agree	Strongly Agree	Agree	Agree	Strongly Agree	Agree	Agree	Strongly Agree	Agree	Strongly Agree	Strongly Agree	Strongly Agree	Strongly Agree	Strongly Agree	Strongly Agree	Strongly Agree	Strongly Agree
417	Neutral	Disagree	Agree	Agree	Neutral	Agree	Agree	Neutral	Agree	Agree	Neutral	Disagree	Strongly Disagree	Neutral	Agree	Agree	Agree
418	Agree	Agree	Agree	Neutral	Agree	Strongly Agree	Strongly Agree	Strongly Agree	Strongly Agree	Strongly Agree	Agree	Agree	Agree	Agree	Agree	Agree	Strongly Agree
419	Agree	Strongly Agree	Strongly Agree	Agree	Strongly Agree	Agree	Strongly Agree	Strongly Agree	Strongly Agree	Agree	Strongly Agree	Strongly Agree	Agree	Strongly Agree	Strongly Agree	Neutral	Neutral
420	Strongly Agree	Strongly Agree	Strongly Agree	Strongly Agree	Strongly Agree	Strongly Agree	Strongly Agree	Strongly Agree	Agree	Strongly Agree	Agree	Agree	Agree	Strongly Agree	Strongly Agree	Strongly Agree	Strongly Agree
421	Strongly Agree	Strongly Agree	Strongly Agree	Agree	Strongly Agree	Strongly Agree	Strongly Agree	Agree	Strongly Agree	Agree	Neutral	Neutral	Neutral	Strongly Disagree	Neutral	Strongly Agree	Strongly Agree
422	Strongly Agree	Agree	Strongly Agree	Strongly Agree	Agree	Strongly Agree	Strongly Agree	Strongly Agree	Strongly Agree	Strongly Agree	Strongly Agree	Agree	Strongly Agree	Agree	Agree	Strongly Agree	Strongly Agree
423	Strongly Agree	Strongly Agree	Agree	Strongly Agree	Strongly Agree	Agree	Agree	Agree	Agree	Strongly Agree	Strongly Agree	Agree	Strongly Agree	Strongly Agree	Strongly Agree	Strongly Agree	Agree
424	Neutral	Agree	Neutral	Neutral	Agree	Agree	Agree	Agree	Agree	Strongly Agree	Neutral	Agree	Disagree	Strongly Disagree	Strongly Disagree	Agree	Disagree
425	Neutral	Disagree	Strongly Disagree	Agree	Neutral	Strongly Agree	Agree	Strongly Disagree	Strongly Disagree	Disagree	Neutral	Disagree	Agree	Agree	Neutral	Agree	Strongly Agree
426	Agree	Agree	Agree	Agree	Strongly Agree	Agree	Neutral	Neutral	Disagree	Neutral	Disagree	Strongly Disagree	Strongly Disagree	Strongly Disagree	Strongly Disagree	Neutral	Disagree
427	Agree	Agree	Agree	Agree	Strongly Agree	Agree	Strongly Agree	Strongly Agree	Strongly Agree	Strongly Agree	Agree	Neutral	Agree	Neutral	Neutral	Agree	Agree
428	Disagree	Neutral	Disagree	Disagree	Strongly Disagree	Agree	Agree	Agree	Agree	Strongly Agree	Agree	Neutral	Strongly Agree	Neutral	Agree	Agree	Disagree
429	Strongly Agree	Strongly Agree	Strongly Agree	Strongly Agree	Strongly Agree	Disagree	Strongly Disagree	Agree	Agree	Strongly Agree	Neutral	Agree	Neutral	Agree	Disagree	Strongly Disagree	Disagree
430	Agree	Agree	Strongly Agree	Agree	Agree	Strongly Agree	Strongly Agree	Neutral	Neutral	Neutral	Neutral	Neutral	Neutral	Agree	Agree	Agree	Neutral
431	Agree	Agree	Neutral	Agree	Agree	Disagree	Disagree	Disagree	Neutral	Neutral	Neutral	Neutral	Disagree	Neutral	Neutral	Strongly Disagree	Strongly Disagree
432	Neutral	Disagree	Disagree	Neutral	Disagree	Neutral	Agree	Agree	Neutral	Agree	Agree	Agree	Agree	Agree	Agree	Disagree	Disagree
433	Strongly Disagree	Neutral	Strongly Disagree	Neutral	Neutral	Strongly Disagree	Disagree	Strongly Disagree	Disagree	Neutral	Strongly Disagree	Disagree	Strongly Disagree	Disagree	Disagree	Neutral	Agree
434	Disagree	Disagree	Agree	Agree	Neutral	Agree	Agree	Agree	Neutral	Agree	Neutral	Agree	Agree	Disagree	Neutral	Agree	Agree
435	Agree	Agree	Strongly Agree	Agree	Strongly Agree	Agree	Disagree	Strongly Agree	Agree	Strongly Agree	Agree	Agree	Strongly Agree	Strongly Agree	Strongly Agree	Agree	Neutral
436	Neutral	Strongly Disagree	Neutral	Strongly Disagree	Neutral	Disagree	Strongly Disagree	Neutral	Agree	Agree	Agree	Agree	Agree	Agree	Agree	Strongly Agree	Strongly Agree
437	Agree	Agree	Agree	Strongly Agree	Agree	Agree	Strongly Agree	Neutral	Disagree	Agree	Neutral	Disagree	Disagree	Neutral	Neutral	Agree	Agree
438	Disagree	Disagree	Neutral	Strongly Disagree	Neutral	Agree	Agree	Neutral	Neutral	Neutral	Neutral	Agree	Agree	Agree	Neutral	Neutral	Disagree
439	Agree	Strongly Agree	Strongly Agree	Neutral	Agree	Neutral	Disagree	Strongly Agree	Strongly Agree	Strongly Agree	Agree	Agree	Strongly Agree	Agree	Agree	Agree	Agree
440	Agree	Neutral	Disagree	Agree	Agree	Disagree	Neutral	Disagree	Disagree	Neutral	Agree	Agree	Agree	Agree	Agree	Neutral	Neutral
441	Neutral	Neutral	Neutral	Strongly Disagree	Agree	Neutral	Neutral	Agree	Agree	Strongly Agree	Agree	Strongly Agree	Agree	Agree	Neutral	Neutral	Agree
442	Agree	Neutral	Neutral	Neutral	Agree	Agree	Agree	Agree	Agree	Strongly Agree	Neutral	Agree	Neutral	Neutral	Agree	Disagree	Disagree
443	Agree	Strongly Agree	Agree	Strongly Agree	Strongly Agree	Agree	Agree	Strongly Agree	Strongly Agree	Agree	Neutral	Agree	Neutral	Disagree	Disagree	Strongly Agree	Strongly Agree
444	Strongly Agree	Strongly Agree	Strongly Agree	Strongly Agree	Agree	Strongly Agree	Strongly Agree	Strongly Agree	Strongly Agree	Strongly Agree	Neutral	Neutral	Neutral	Disagree	Strongly Disagree	Strongly Agree	Strongly Agree
445	Neutral	Disagree	Neutral	Neutral	Neutral	Agree	Agree	Agree	Neutral	Neutral	Disagree	Strongly Disagree	Strongly Disagree	Neutral	Neutral	Strongly Disagree	Neutral
446	Strongly Disagree	Disagree	Strongly Disagree	Neutral	Strongly Disagree	Disagree	Strongly Disagree	Disagree	Strongly Disagree	Disagree	Agree	Agree	Neutral	Strongly Agree	Agree	Neutral	Agree
447	Neutral	Strongly Disagree	Disagree	Agree	Neutral	Disagree	Agree	Neutral	Agree	Neutral	Disagree	Neutral	Disagree	Neutral	Neutral	Neutral	Disagree
448	Disagree	Disagree	Neutral	Disagree	Disagree	Agree	Agree	Disagree	Strongly Disagree	Neutral	Agree	Neutral	Neutral	Strongly Agree	Neutral	Disagree	Strongly Disagree
449	Strongly Agree	Strongly Agree	Agree	Strongly Agree	Strongly Agree	Strongly Agree	Strongly Agree	Strongly Agree	Strongly Agree	Strongly Agree	Agree	Agree	Agree	Strongly Agree	Strongly Agree	Strongly Agree	Strongly Agree
450	Neutral	Neutral	Agree	Agree	Strongly Disagree	Strongly Disagree	Disagree	Neutral	Disagree	Neutral	Strongly Disagree	Neutral	Neutral	Neutral	Strongly Disagree	Disagree	Disagree
451	Agree	Agree	Strongly Agree	Agree	Agree	Neutral	Neutral	Strongly Agree	Agree	Strongly Agree	Agree	Strongly Agree	Agree	Agree	Strongly Agree	Strongly Agree	Agree
452	Strongly Agree	Strongly Agree	Agree	Strongly Agree	Strongly Agree	Strongly Agree	Agree	Strongly Agree	Agree	Strongly Agree	Strongly Agree	Agree	Agree	Strongly Agree	Strongly Agree	Strongly Agree	Agree
453	Strongly Agree	Strongly Agree	Strongly Agree	Strongly Agree	Strongly Agree	Agree	Neutral	Strongly Agree	Agree	Strongly Agree	Strongly Agree	Strongly Agree	Strongly Agree	Strongly Agree	Strongly Agree	Strongly Agree	Strongly Agree
454	Agree	Agree	Agree	Neutral	Neutral	Strongly Agree	Strongly Agree	Strongly Agree	Strongly Agree	Strongly Agree	Agree	Strongly Agree	Strongly Agree	Agree	Strongly Agree	Strongly Agree	Agree
455	Strongly Agree	Strongly Agree	Strongly Agree	Strongly Agree	Strongly Agree	Agree	Agree	Strongly Agree	Agree	Strongly Agree	Agree	Strongly Agree	Strongly Agree	Agree	Agree	Agree	Strongly Agree
456	Neutral	Disagree	Neutral	Neutral	Strongly Disagree	Strongly Agree	Agree	Strongly Disagree	Neutral	Strongly Disagree	Agree	Neutral	Agree	Neutral	Neutral	Neutral	Disagree
457	Strongly Agree	Strongly Agree	Strongly Agree	Strongly Agree	Strongly Agree	Agree	Neutral	Agree	Strongly Agree	Strongly Agree	Neutral	Neutral	Neutral	Agree	Agree	Agree	Strongly Agree
458	Agree	Agree	Agree	Agree	Agree	Agree	Strongly Agree	Strongly Disagree	Strongly Disagree	Neutral	Disagree	Strongly Disagree	Neutral	Neutral	Neutral	Agree	Strongly Agree
459	Strongly Agree	Agree	Agree	Agree	Strongly Agree	Strongly Agree	Strongly Agree	Strongly Agree	Agree	Strongly Agree	Agree	Neutral	Agree	Agree	Neutral	Strongly Agree	Strongly Agree
460	Strongly Agree	Strongly Agree	Strongly Agree	Agree	Strongly Agree	Agree	Agree	Disagree	Neutral	Disagree	Neutral	Neutral	Neutral	Disagree	Agree	Strongly Agree	Strongly Agree
461	Strongly Disagree	Disagree	Strongly Disagree	Neutral	Neutral	Agree	Strongly Agree	Disagree	Strongly Disagree	Neutral	Neutral	Neutral	Disagree	Neutral	Disagree	Disagree	Strongly Disagree
462	Strongly Agree	Strongly Agree	Strongly Agree	Strongly Agree	Strongly Agree	Agree	Agree	Neutral	Neutral	Neutral	Neutral	Neutral	Neutral	Strongly Disagree	Disagree	Neutral	Agree
463	Neutral	Disagree	Agree	Agree	Agree	Neutral	Disagree	Strongly Disagree	Neutral	Neutral	Neutral	Agree	Agree	Agree	Neutral	Agree	Strongly Agree
464	Agree	Neutral	Agree	Agree	Agree	Disagree	Neutral	Agree	Agree	Agree	Disagree	Strongly Disagree	Strongly Disagree	Disagree	Neutral	Neutral	Agree
465	Strongly Agree	Agree	Strongly Agree	Agree	Strongly Agree	Agree	Strongly Agree	Agree	Strongly Agree	Strongly Agree	Neutral	Strongly Disagree	Neutral	Agree	Neutral	Agree	Strongly Agree
466	Strongly Agree	Agree	Strongly Agree	Strongly Agree	Agree	Agree	Neutral	Neutral	Agree	Neutral	Agree	Agree	Strongly Agree	Agree	Agree	Disagree	Neutral
467	Disagree	Agree	Neutral	Disagree	Neutral	Disagree	Neutral	Disagree	Neutral	Neutral	Neutral	Agree	Neutral	Strongly Disagree	Neutral	Disagree	Strongly Disagree
468	Disagree	Strongly Disagree	Strongly Disagree	Disagree	Agree	Disagree	Disagree	Neutral	Neutral	Neutral	Agree	Agree	Agree	Agree	Agree	Neutral	Agree
469	Agree	Strongly Agree	Strongly Agree	Agree	Strongly Agree	Agree	Agree	Strongly Agree	Agree	Strongly Agree	Strongly Agree	Strongly Agree	Strongly Agree	Strongly Agree	Strongly Agree	Strongly Agree	Strongly Agree
470	Strongly Agree	Agree	Strongly Agree	Strongly Agree	Strongly Agree	Strongly Agree	Strongly Agree	Neutral	Strongly Agree	Neutral	Agree	Strongly Agree	Strongly Agree	Agree	Strongly Agree	Strongly Agree	Strongly Agree
471	Strongly Agree	Strongly Agree	Agree	Agree	Strongly Agree	Strongly Agree	Agree	Strongly Agree	Strongly Agree	Agree	Neutral	Neutral	Agree	Strongly Disagree	Disagree	Strongly Agree	Agree
472	Strongly Agree	Agree	Agree	Strongly Agree	Strongly Agree	Strongly Agree	Strongly Agree	Strongly Agree	Strongly Agree	Strongly Agree	Strongly Agree	Strongly Agree	Agree	Strongly Agree	Agree	Strongly Agree	Strongly Agree
473	Agree	Strongly Agree	Agree	Agree	Strongly Agree	Neutral	Disagree	Strongly Agree	Strongly Agree	Strongly Agree	Agree	Neutral	Agree	Agree	Neutral	Neutral	Neutral
474	Neutral	Strongly Disagree	Agree	Neutral	Neutral	Disagree	Agree	Neutral	Strongly Disagree	Disagree	Agree	Agree	Agree	Strongly Agree	Agree	Strongly Disagree	Disagree
475	Agree	Agree	Agree	Agree	Neutral	Agree	Agree	Neutral	Strongly Disagree	Disagree	Neutral	Agree	Neutral	Neutral	Agree	Strongly Agree	Agree
476	Neutral	Neutral	Neutral	Neutral	Neutral	Neutral	Neutral	Strongly Disagree	Disagree	Neutral	Neutral	Disagree	Neutral	Disagree	Neutral	Disagree	Disagree
477	Neutral	Agree	Agree	Agree	Neutral	Strongly Agree	Strongly Agree	Disagree	Neutral	Strongly Disagree	Strongly Agree	Strongly Agree	Agree	Agree	Agree	Agree	Agree
478	Strongly Agree	Strongly Agree	Agree	Agree	Strongly Agree	Strongly Agree	Strongly Agree	Strongly Agree	Strongly Agree	Agree	Agree	Agree	Neutral	Agree	Neutral	Agree	Strongly Agree
479	Neutral	Agree	Disagree	Neutral	Disagree	Neutral	Strongly Disagree	Neutral	Agree	Neutral	Disagree	Disagree	Neutral	Neutral	Strongly Disagree	Disagree	Disagree
480	Strongly Agree	Strongly Agree	Strongly Agree	Strongly Agree	Strongly Agree	Strongly Agree	Strongly Agree	Strongly Agree	Agree	Strongly Agree	Agree	Agree	Agree	Agree	Agree	Agree	Disagree
481	Agree	Agree	Strongly Agree	Neutral	Agree	Agree	Agree	Strongly Agree	Agree	Strongly Agree	Agree	Neutral	Strongly Agree	Strongly Agree	Agree	Strongly Agree	Strongly Agree
482	Neutral	Agree	Disagree	Agree	Agree	Agree	Agree	Disagree	Neutral	Strongly Disagree	Agree	Neutral	Neutral	Agree	Agree	Agree	Agree
483	Strongly Agree	Agree	Strongly Agree	Agree	Strongly Agree	Agree	Disagree	Neutral	Neutral	Disagree	Strongly Agree	Strongly Agree	Strongly Agree	Strongly Agree	Strongly Agree	Agree	Neutral
484	Disagree	Agree	Neutral	Disagree	Neutral	Strongly Agree	Strongly Agree	Neutral	Disagree	Disagree	Disagree	Neutral	Neutral	Disagree	Neutral	Strongly Disagree	Strongly Disagree
485	Strongly Agree	Agree	Strongly Agree	Strongly Agree	Strongly Agree	Strongly Agree	Strongly Agree	Agree	Agree	Neutral	Agree	Agree	Agree	Strongly Agree	Strongly Agree	Agree	Strongly Agree
486	Agree	Strongly Agree	Agree	Agree	Strongly Agree	Strongly Agree	Agree	Strongly Agree	Strongly Agree	Strongly Agree	Strongly Agree	Strongly Agree	Strongly Agree	Strongly Agree	Strongly Agree	Strongly Agree	Agree
487	Strongly Agree	Strongly Agree	Strongly Agree	Strongly Agree	Strongly Agree	Neutral	Disagree	Agree	Strongly Agree	Neutral	Strongly Agree	Strongly Agree	Agree	Agree	Agree	Neutral	Neutral
488	Agree	Neutral	Neutral	Neutral	Agree	Strongly Agree	Strongly Agree	Agree	Neutral	Neutral	Strongly Agree	Strongly Agree	Strongly Agree	Strongly Agree	Strongly Agree	Strongly Agree	Strongly Agree
489	Agree	Agree	Agree	Strongly Agree	Agree	Strongly Agree	Strongly Agree	Strongly Agree	Strongly Agree	Strongly Agree	Disagree	Neutral	Disagree	Disagree	Disagree	Strongly Agree	Strongly Agree
490	Disagree	Neutral	Neutral	Disagree	Neutral	Agree	Agree	Neutral	Neutral	Neutral	Strongly Disagree	Disagree	Strongly Disagree	Neutral	Disagree	Neutral	Strongly Disagree
491	Neutral	Disagree	Strongly Disagree	Neutral	Neutral	Agree	Strongly Agree	Neutral	Agree	Neutral	Disagree	Neutral	Disagree	Strongly Disagree	Disagree	Strongly Disagree	Neutral
492	Strongly Agree	Agree	Strongly Agree	Strongly Agree	Strongly Agree	Strongly Agree	Agree	Strongly Agree	Agree	Agree	Agree	Neutral	Agree	Agree	Agree	Strongly Agree	Strongly Agree
493	Disagree	Neutral	Strongly Disagree	Neutral	Disagree	Agree	Neutral	Agree	Disagree	Strongly Agree	Strongly Agree	Strongly Agree	Strongly Agree	Agree	Agree	Disagree	Neutral
494	Strongly Agree	Agree	Strongly Agree	Strongly Agree	Agree	Agree	Strongly Agree	Neutral	Agree	Agree	Agree	Neutral	Agree	Strongly Agree	Agree	Agree	Agree
495	Agree	Strongly Agree	Agree	Agree	Strongly Agree	Strongly Agree	Agree	Strongly Agree	Strongly Agree	Agree	Strongly Agree	Strongly Agree	Agree	Strongly Agree	Strongly Agree	Agree	Agree
496	Neutral	Agree	Agree	Agree	Neutral	Agree	Agree	Neutral	Strongly Disagree	Neutral	Neutral	Agree	Neutral	Agree	Neutral	Agree	Strongly Agree
497	Strongly Agree	Strongly Agree	Strongly Agree	Strongly Agree	Agree	Strongly Agree	Strongly Agree	Strongly Agree	Strongly Agree	Agree	Neutral	Neutral	Agree	Agree	Disagree	Strongly Agree	Strongly Agree
498	Strongly Disagree	Neutral	Neutral	Neutral	Disagree	Strongly Disagree	Neutral	Disagree	Strongly Disagree	Disagree	Neutral	Neutral	Neutral	Strongly Disagree	Agree	Agree	Strongly Agree
499	Agree	Strongly Agree	Agree	Strongly Agree	Agree	Strongly Agree	Strongly Agree	Strongly Agree	Strongly Agree	Agree	Agree	Agree	Agree	Agree	Agree	Strongly Agree	Strongly Agree
500	Strongly Agree	Strongly Agree	Agree	Strongly Agree	Strongly Agree	Strongly Agree	Strongly Agree	Agree	Agree	Neutral	Strongly Agree	Agree	Strongly Agree	Agree	Strongly Agree	Agree	Strongly Agree
501	Neutral	Neutral	Agree	Agree	Disagree	Agree	Agree	Neutral	Neutral	Agree	Neutral	Disagree	Neutral	Neutral	Neutral	Agree	Agree
502	Strongly Agree	Strongly Agree	Strongly Agree	Agree	Strongly Agree	Strongly Agree	Strongly Agree	Strongly Agree	Strongly Agree	Strongly Agree	Strongly Agree	Strongly Agree	Agree	Strongly Agree	Strongly Agree	Strongly Agree	Strongly Agree
503	Strongly Agree	Strongly Agree	Strongly Agree	Agree	Agree	Agree	Strongly Agree	Agree	Strongly Agree	Neutral	Agree	Agree	Neutral	Agree	Agree	Strongly Agree	Strongly Agree
504	Strongly Agree	Agree	Strongly Agree	Strongly Agree	Strongly Agree	Strongly Agree	Strongly Agree	Agree	Agree	Neutral	Neutral	Disagree	Agree	Neutral	Agree	Strongly Agree	Strongly Agree
505	Strongly Agree	Strongly Agree	Strongly Agree	Strongly Agree	Strongly Agree	Strongly Agree	Strongly Agree	Strongly Agree	Strongly Agree	Agree	Agree	Agree	Agree	Agree	Agree	Strongly Agree	Strongly Agree
506	Strongly Agree	Strongly Agree	Strongly Agree	Strongly Agree	Strongly Agree	Agree	Agree	Strongly Agree	Strongly Agree	Strongly Agree	Agree	Agree	Strongly Agree	Neutral	Agree	Strongly Agree	Strongly Agree
507	Neutral	Agree	Agree	Neutral	Strongly Disagree	Strongly Disagree	Neutral	Strongly Agree	Strongly Agree	Agree	Agree	Strongly Agree	Agree	Strongly Agree	Strongly Agree	Agree	Agree
508	Disagree	Neutral	Neutral	Neutral	Strongly Disagree	Disagree	Disagree	Agree	Neutral	Neutral	Neutral	Neutral	Neutral	Neutral	Disagree	Strongly Disagree	Disagree
509	Strongly Agree	Strongly Agree	Strongly Agree	Strongly Agree	Strongly Agree	Agree	Agree	Agree	Agree	Neutral	Neutral	Neutral	Agree	Neutral	Disagree	Agree	Agree
510	Strongly Agree	Strongly Agree	Agree	Strongly Agree	Strongly Agree	Strongly Agree	Strongly Agree	Strongly Agree	Strongly Agree	Strongly Agree	Neutral	Agree	Disagree	Neutral	Neutral	Strongly Agree	Agree
511	Neutral	Neutral	Neutral	Disagree	Strongly Disagree	Disagree	Strongly Disagree	Agree	Agree	Neutral	Agree	Agree	Neutral	Neutral	Agree	Neutral	Agree
512	Strongly Agree	Strongly Agree	Strongly Agree	Strongly Agree	Strongly Agree	Strongly Agree	Agree	Agree	Agree	Strongly Agree	Agree	Agree	Strongly Agree	Strongly Agree	Agree	Strongly Agree	Agree
513	Disagree	Strongly Disagree	Strongly Disagree	Strongly Disagree	Agree	Agree	Agree	Strongly Agree	Strongly Agree	Strongly Agree	Neutral	Disagree	Neutral	Neutral	Neutral	Strongly Agree	Strongly Agree
514	Strongly Agree	Agree	Strongly Agree	Strongly Agree	Strongly Agree	Strongly Agree	Agree	Strongly Agree	Strongly Agree	Strongly Agree	Neutral	Neutral	Agree	Neutral	Neutral	Neutral	Agree
515	Neutral	Disagree	Neutral	Agree	Strongly Disagree	Agree	Agree	Disagree	Disagree	Disagree	Disagree	Neutral	Neutral	Neutral	Disagree	Disagree	Neutral
516	Neutral	Neutral	Agree	Neutral	Neutral	Strongly Disagree	Neutral	Disagree	Agree	Disagree	Agree	Strongly Agree	Strongly Agree	Strongly Agree	Agree	Agree	Neutral
517	Strongly Agree	Strongly Agree	Strongly Agree	Strongly Agree	Strongly Agree	Agree	Neutral	Neutral	Agree	Strongly Agree	Strongly Agree	Agree	Agree	Agree	Agree	Strongly Agree	Strongly Agree
518	Strongly Agree	Strongly Agree	Strongly Agree	Agree	Strongly Agree	Strongly Agree	Strongly Agree	Strongly Agree	Agree	Strongly Agree	Agree	Strongly Agree	Neutral	Neutral	Agree	Strongly Agree	Strongly Agree
519	Agree	Agree	Agree	Agree	Strongly Agree	Strongly Agree	Strongly Agree	Strongly Agree	Strongly Agree	Agree	Strongly Agree	Strongly Agree	Agree	Strongly Agree	Agree	Strongly Agree	Strongly Agree
520	Agree	Strongly Agree	Neutral	Agree	Agree	Strongly Agree	Strongly Agree	Agree	Agree	Neutral	Strongly Agree	Strongly Agree	Agree	Strongly Agree	Agree	Strongly Agree	Strongly Agree
521	Agree	Disagree	Strongly Agree	Neutral	Strongly Agree	Neutral	Agree	Neutral	Neutral	Agree	Neutral	Agree	Strongly Disagree	Strongly Disagree	Disagree	Strongly Disagree	Strongly Disagree
522	Agree	Neutral	Strongly Agree	Neutral	Agree	Agree	Agree	Agree	Agree	Agree	Agree	Strongly Agree	Agree	Agree	Strongly Agree	Strongly Agree	Strongly Agree
523	Strongly Disagree	Strongly Disagree	Neutral	Neutral	Neutral	Agree	Neutral	Neutral	Agree	Neutral	Neutral	Neutral	Neutral	Agree	Disagree	Disagree	Strongly Disagree
524	Strongly Agree	Strongly Agree	Strongly Agree	Strongly Agree	Strongly Agree	Strongly Agree	Agree	Strongly Agree	Strongly Agree	Agree	Agree	Agree	Strongly Agree	Agree	Strongly Agree	Strongly Agree	Strongly Agree
525	Disagree	Neutral	Neutral	Agree	Neutral	Strongly Agree	Strongly Agree	Neutral	Disagree	Agree	Neutral	Disagree	Disagree	Neutral	Neutral	Agree	Neutral
526	Neutral	Neutral	Strongly Disagree	Agree	Disagree	Agree	Agree	Agree	Agree	Agree	Agree	Agree	Neutral	Agree	Neutral	Strongly Agree	Strongly Agree
527	Agree	Agree	Strongly Agree	Agree	Agree	Agree	Neutral	Disagree	Strongly Disagree	Disagree	Neutral	Neutral	Agree	Disagree	Neutral	Neutral	Agree
528	Neutral	Neutral	Neutral	Strongly Disagree	Agree	Disagree	Disagree	Agree	Strongly Agree	Agree	Strongly Disagree	Neutral	Strongly Disagree	Strongly Disagree	Strongly Disagree	Neutral	Agree
529	Strongly Agree	Strongly Agree	Agree	Strongly Agree	Strongly Agree	Strongly Agree	Strongly Agree	Neutral	Neutral	Neutral	Strongly Agree	Strongly Agree	Strongly Agree	Strongly Agree	Strongly Agree	Agree	Agree
530	Neutral	Disagree	Neutral	Disagree	Strongly Disagree	Agree	Neutral	Agree	Strongly Agree	Agree	Neutral	Neutral	Neutral	Neutral	Neutral	Strongly Disagree	Strongly Disagree
531	Strongly Agree	Strongly Agree	Strongly Agree	Agree	Strongly Agree	Strongly Agree	Strongly Agree	Strongly Agree	Strongly Agree	Strongly Agree	Disagree	Disagree	Disagree	Disagree	Disagree	Agree	Agree
532	Agree	Agree	Agree	Neutral	Agree	Agree	Strongly Agree	Neutral	Neutral	Neutral	Strongly Agree	Strongly Agree	Agree	Agree	Strongly Agree	Strongly Agree	Strongly Agree
533	Strongly Agree	Strongly Agree	Agree	Strongly Agree	Agree	Neutral	Agree	Strongly Agree	Agree	Agree	Strongly Agree	Strongly Agree	Strongly Agree	Strongly Agree	Agree	Agree	Agree
534	Agree	Neutral	Neutral	Agree	Neutral	Agree	Strongly Agree	Strongly Disagree	Disagree	Disagree	Neutral	Neutral	Agree	Neutral	Neutral	Agree	Disagree
535	Neutral	Neutral	Agree	Strongly Disagree	Strongly Disagree	Strongly Agree	Strongly Agree	Agree	Agree	Neutral	Strongly Agree	Strongly Agree	Agree	Strongly Agree	Strongly Agree	Neutral	Strongly Disagree
536	Neutral	Neutral	Neutral	Agree	Agree	Strongly Agree	Agree	Strongly Agree	Agree	Agree	Neutral	Disagree	Disagree	Agree	Neutral	Strongly Agree	Strongly Agree
537	Agree	Strongly Agree	Strongly Agree	Agree	Neutral	Strongly Disagree	Neutral	Agree	Neutral	Strongly Agree	Agree	Agree	Strongly Agree	Agree	Neutral	Agree	Agree
538	Strongly Agree	Strongly Agree	Strongly Agree	Strongly Agree	Strongly Agree	Strongly Agree	Strongly Agree	Strongly Agree	Agree	Agree	Strongly Agree	Strongly Agree	Strongly Agree	Strongly Agree	Strongly Agree	Strongly Agree	Strongly Agree
539	Neutral	Strongly Disagree	Neutral	Strongly Disagree	Neutral	Neutral	Agree	Strongly Agree	Agree	Strongly Agree	Strongly Agree	Strongly Agree	Agree	Strongly Agree	Agree	Agree	Strongly Agree
540	Neutral	Agree	Agree	Disagree	Agree	Strongly Agree	Strongly Agree	Strongly Agree	Neutral	Agree	Strongly Agree	Strongly Agree	Strongly Agree	Agree	Strongly Agree	Strongly Disagree	Disagree
541	Agree	Agree	Agree	Agree	Agree	Strongly Disagree	Strongly Disagree	Strongly Disagree	Neutral	Disagree	Neutral	Neutral	Neutral	Neutral	Strongly Disagree	Agree	Neutral
542	Neutral	Strongly Disagree	Agree	Disagree	Neutral	Strongly Agree	Strongly Agree	Agree	Neutral	Agree	Neutral	Neutral	Neutral	Neutral	Neutral	Strongly Agree	Strongly Agree
543	Disagree	Strongly Disagree	Disagree	Disagree	Neutral	Strongly Agree	Strongly Agree	Neutral	Agree	Neutral	Neutral	Disagree	Agree	Neutral	Strongly Disagree	Agree	Agree
544	Neutral	Agree	Agree	Disagree	Agree	Disagree	Agree	Disagree	Disagree	Strongly Disagree	Neutral	Neutral	Agree	Disagree	Neutral	Neutral	Neutral
545	Disagree	Neutral	Strongly Disagree	Neutral	Neutral	Agree	Strongly Agree	Neutral	Neutral	Agree	Neutral	Neutral	Neutral	Neutral	Neutral	Disagree	Disagree
546	Strongly Agree	Strongly Agree	Strongly Agree	Strongly Agree	Strongly Agree	Strongly Agree	Strongly Agree	Agree	Agree	Agree	Neutral	Agree	Neutral	Disagree	Strongly Disagree	Disagree	Neutral
547	Strongly Agree	Strongly Agree	Strongly Agree	Strongly Agree	Strongly Agree	Strongly Agree	Agree	Agree	Strongly Agree	Agree	Strongly Agree	Agree	Agree	Agree	Strongly Agree	Strongly Agree	Strongly Agree
548	Strongly Agree	Strongly Agree	Strongly Agree	Strongly Agree	Strongly Agree	Strongly Disagree	Neutral	Agree	Agree	Strongly Agree	Strongly Disagree	Neutral	Neutral	Disagree	Neutral	Strongly Agree	Strongly Agree
549	Agree	Agree	Agree	Strongly Agree	Strongly Agree	Neutral	Strongly Disagree	Disagree	Disagree	Disagree	Agree	Agree	Agree	Agree	Strongly Agree	Agree	Strongly Agree
550	Neutral	Agree	Disagree	Disagree	Strongly Disagree	Neutral	Disagree	Strongly Disagree	Neutral	Disagree	Neutral	Disagree	Neutral	Neutral	Disagree	Disagree	Neutral
551	Neutral	Neutral	Strongly Disagree	Neutral	Disagree	Neutral	Disagree	Neutral	Neutral	Agree	Neutral	Agree	Neutral	Neutral	Agree	Strongly Agree	Strongly Agree
552	Strongly Disagree	Neutral	Disagree	Disagree	Disagree	Disagree	Neutral	Strongly Agree	Strongly Agree	Strongly Agree	Disagree	Neutral	Neutral	Neutral	Neutral	Agree	Disagree
553	Disagree	Disagree	Neutral	Neutral	Disagree	Agree	Agree	Disagree	Neutral	Neutral	Agree	Neutral	Neutral	Agree	Neutral	Disagree	Disagree
554	Strongly Agree	Strongly Agree	Strongly Agree	Agree	Agree	Strongly Agree	Agree	Strongly Agree	Agree	Strongly Agree	Agree	Agree	Strongly Agree	Neutral	Agree	Strongly Agree	Strongly Agree
555	Disagree	Neutral	Neutral	Disagree	Neutral	Neutral	Strongly Disagree	Neutral	Disagree	Neutral	Neutral	Agree	Neutral	Neutral	Neutral	Agree	Agree
556	Disagree	Neutral	Neutral	Neutral	Agree	Neutral	Agree	Agree	Agree	Agree	Neutral	Disagree	Neutral	Neutral	Disagree	Agree	Agree
557	Agree	Neutral	Agree	Neutral	Strongly Agree	Strongly Agree	Strongly Agree	Strongly Agree	Strongly Agree	Agree	Agree	Neutral	Agree	Agree	Neutral	Strongly Agree	Agree
558	Agree	Disagree	Agree	Neutral	Agree	Neutral	Agree	Disagree	Neutral	Strongly Disagree	Neutral	Neutral	Agree	Neutral	Strongly Disagree	Neutral	Strongly Disagree
559	Neutral	Neutral	Agree	Disagree	Strongly Disagree	Agree	Strongly Agree	Agree	Agree	Neutral	Agree	Agree	Neutral	Neutral	Neutral	Strongly Agree	Strongly Agree
560	Strongly Agree	Strongly Agree	Strongly Agree	Strongly Agree	Strongly Agree	Agree	Agree	Strongly Agree	Agree	Strongly Agree	Strongly Agree	Agree	Strongly Agree	Strongly Agree	Strongly Agree	Agree	Strongly Agree
561	Strongly Agree	Agree	Strongly Agree	Strongly Agree	Strongly Agree	Agree	Strongly Agree	Strongly Agree	Strongly Agree	Strongly Agree	Neutral	Neutral	Agree	Disagree	Agree	Agree	Strongly Agree
562	Disagree	Strongly Disagree	Neutral	Disagree	Disagree	Agree	Agree	Neutral	Disagree	Strongly Disagree	Neutral	Agree	Neutral	Neutral	Disagree	Neutral	Neutral
563	Strongly Agree	Agree	Agree	Agree	Strongly Agree	Agree	Agree	Agree	Neutral	Neutral	Agree	Agree	Agree	Agree	Strongly Agree	Strongly Agree	Strongly Agree
564	Strongly Disagree	Neutral	Neutral	Disagree	Disagree	Disagree	Neutral	Disagree	Agree	Disagree	Neutral	Neutral	Neutral	Neutral	Neutral	Strongly Disagree	Strongly Disagree
565	Agree	Strongly Agree	Strongly Agree	Agree	Agree	Agree	Strongly Agree	Strongly Disagree	Neutral	Neutral	Neutral	Neutral	Neutral	Neutral	Agree	Disagree	Strongly Disagree
566	Strongly Disagree	Strongly Disagree	Disagree	Neutral	Neutral	Agree	Agree	Neutral	Neutral	Neutral	Neutral	Disagree	Strongly Disagree	Neutral	Strongly Disagree	Agree	Strongly Agree
567	Neutral	Disagree	Neutral	Disagree	Disagree	Strongly Agree	Agree	Strongly Agree	Neutral	Agree	Strongly Agree	Strongly Agree	Strongly Agree	Strongly Agree	Strongly Agree	Agree	Disagree
568	Agree	Agree	Agree	Agree	Neutral	Neutral	Agree	Disagree	Disagree	Neutral	Agree	Neutral	Neutral	Agree	Agree	Disagree	Disagree
569	Disagree	Neutral	Neutral	Agree	Neutral	Agree	Agree	Strongly Agree	Strongly Agree	Strongly Agree	Agree	Strongly Agree	Strongly Agree	Agree	Agree	Strongly Agree	Strongly Agree
570	Strongly Agree	Strongly Agree	Strongly Agree	Strongly Agree	Strongly Agree	Strongly Agree	Agree	Agree	Neutral	Agree	Agree	Agree	Strongly Agree	Strongly Agree	Agree	Neutral	Agree
571	Disagree	Disagree	Neutral	Neutral	Disagree	Strongly Agree	Strongly Agree	Agree	Strongly Agree	Strongly Agree	Strongly Agree	Strongly Agree	Strongly Agree	Agree	Strongly Agree	Agree	Agree
572	Disagree	Neutral	Agree	Disagree	Agree	Neutral	Agree	Strongly Disagree	Neutral	Disagree	Neutral	Agree	Neutral	Agree	Neutral	Agree	Agree
573	Agree	Strongly Agree	Agree	Neutral	Strongly Agree	Strongly Agree	Strongly Agree	Strongly Agree	Strongly Agree	Strongly Agree	Strongly Agree	Strongly Agree	Strongly Agree	Strongly Agree	Agree	Strongly Agree	Strongly Agree
574	Strongly Agree	Strongly Agree	Strongly Agree	Strongly Agree	Strongly Agree	Strongly Agree	Strongly Agree	Agree	Agree	Neutral	Strongly Agree	Agree	Agree	Strongly Agree	Strongly Agree	Agree	Strongly Agree
575	Disagree	Agree	Neutral	Neutral	Strongly Disagree	Disagree	Agree	Disagree	Neutral	Disagree	Disagree	Neutral	Neutral	Neutral	Disagree	Disagree	Neutral
576	Disagree	Strongly Disagree	Disagree	Strongly Disagree	Disagree	Agree	Agree	Strongly Agree	Strongly Agree	Strongly Agree	Disagree	Disagree	Disagree	Neutral	Disagree	Disagree	Strongly Disagree
577	Agree	Agree	Strongly Agree	Agree	Agree	Neutral	Agree	Neutral	Agree	Agree	Disagree	Strongly Disagree	Neutral	Neutral	Strongly Disagree	Disagree	Agree
578	Agree	Strongly Agree	Agree	Agree	Agree	Agree	Neutral	Agree	Neutral	Agree	Strongly Agree	Strongly Agree	Strongly Agree	Agree	Strongly Agree	Strongly Agree	Strongly Agree
579	Agree	Agree	Agree	Neutral	Strongly Agree	Strongly Agree	Strongly Agree	Agree	Neutral	Agree	Agree	Agree	Agree	Neutral	Neutral	Strongly Agree	Strongly Agree
580	Strongly Agree	Strongly Agree	Strongly Agree	Strongly Agree	Strongly Agree	Disagree	Neutral	Agree	Neutral	Neutral	Neutral	Neutral	Neutral	Neutral	Disagree	Strongly Agree	Strongly Agree
581	Agree	Agree	Strongly Agree	Agree	Neutral	Strongly Agree	Strongly Agree	Neutral	Agree	Agree	Agree	Agree	Agree	Strongly Agree	Strongly Agree	Strongly Agree	Strongly Agree
582	Agree	Neutral	Strongly Agree	Agree	Strongly Agree	Strongly Agree	Strongly Agree	Agree	Agree	Agree	Strongly Agree	Strongly Agree	Agree	Strongly Agree	Strongly Agree	Strongly Agree	Strongly Agree
583	Strongly Agree	Strongly Agree	Strongly Agree	Strongly Agree	Strongly Agree	Strongly Agree	Agree	Strongly Agree	Strongly Agree	Strongly Agree	Agree	Strongly Agree	Agree	Agree	Neutral	Strongly Agree	Strongly Agree
584	Agree	Neutral	Agree	Neutral	Agree	Disagree	Strongly Disagree	Agree	Strongly Agree	Agree	Neutral	Disagree	Disagree	Strongly Disagree	Neutral	Disagree	Strongly Disagree
585	Strongly Agree	Strongly Agree	Strongly Agree	Strongly Agree	Strongly Agree	Strongly Agree	Strongly Agree	Strongly Agree	Strongly Agree	Strongly Agree	Strongly Agree	Strongly Agree	Agree	Strongly Agree	Agree	Strongly Agree	Strongly Agree
586	Agree	Agree	Neutral	Agree	Strongly Agree	Strongly Agree	Agree	Neutral	Disagree	Agree	Strongly Agree	Agree	Strongly Agree	Strongly Agree	Agree	Strongly Agree	Strongly Agree
587	Strongly Agree	Strongly Agree	Agree	Strongly Agree	Strongly Agree	Disagree	Strongly Disagree	Strongly Disagree	Neutral	Disagree	Neutral	Neutral	Disagree	Disagree	Agree	Neutral	Disagree
588	Neutral	Neutral	Neutral	Neutral	Disagree	Agree	Agree	Neutral	Neutral	Agree	Agree	Neutral	Strongly Agree	Agree	Agree	Strongly Agree	Agree
589	Agree	Agree	Disagree	Neutral	Agree	Neutral	Neutral	Strongly Agree	Strongly Agree	Agree	Neutral	Agree	Neutral	Agree	Agree	Neutral	Neutral
590	Strongly Agree	Strongly Agree	Agree	Strongly Agree	Strongly Agree	Agree	Neutral	Strongly Agree	Agree	Strongly Agree	Strongly Agree	Strongly Agree	Strongly Agree	Agree	Agree	Strongly Agree	Strongly Agree
591	Strongly Agree	Agree	Strongly Agree	Agree	Strongly Agree	Strongly Agree	Strongly Agree	Agree	Agree	Agree	Strongly Disagree	Disagree	Strongly Disagree	Disagree	Neutral	Strongly Agree	Agree
592	Agree	Neutral	Neutral	Agree	Agree	Strongly Agree	Strongly Agree	Strongly Agree	Strongly Agree	Strongly Agree	Agree	Strongly Agree	Agree	Agree	Agree	Strongly Agree	Strongly Agree
593	Agree	Neutral	Agree	Strongly Agree	Strongly Agree	Strongly Agree	Strongly Agree	Agree	Neutral	Neutral	Agree	Agree	Agree	Strongly Agree	Strongly Agree	Strongly Agree	Strongly Agree
594	Neutral	Agree	Neutral	Strongly Disagree	Agree	Disagree	Disagree	Agree	Strongly Agree	Agree	Agree	Agree	Neutral	Strongly Agree	Neutral	Neutral	Agree
595	Agree	Strongly Agree	Strongly Agree	Strongly Agree	Agree	Strongly Agree	Strongly Agree	Strongly Agree	Strongly Agree	Strongly Agree	Neutral	Agree	Neutral	Agree	Disagree	Agree	Disagree
596	Neutral	Agree	Disagree	Neutral	Agree	Disagree	Neutral	Neutral	Agree	Agree	Neutral	Neutral	Disagree	Neutral	Strongly Disagree	Neutral	Neutral
597	Strongly Agree	Strongly Agree	Agree	Agree	Strongly Agree	Strongly Agree	Strongly Agree	Neutral	Neutral	Strongly Disagree	Strongly Agree	Strongly Agree	Strongly Agree	Strongly Agree	Strongly Agree	Agree	Neutral
598	Agree	Agree	Neutral	Agree	Neutral	Agree	Agree	Neutral	Neutral	Neutral	Neutral	Strongly Disagree	Disagree	Strongly Disagree	Neutral	Neutral	Strongly Agree
599	Strongly Agree	Strongly Agree	Strongly Agree	Agree	Agree	Strongly Agree	Strongly Agree	Strongly Agree	Strongly Agree	Agree	Agree	Agree	Strongly Agree	Strongly Agree	Agree	Strongly Agree	Strongly Agree
600	Strongly Agree	Strongly Agree	Strongly Agree	Strongly Agree	Agree	Strongly Disagree	Neutral	Agree	Neutral	Neutral	Strongly Agree	Strongly Agree	Agree	Agree	Strongly Agree	Strongly Agree	Strongly Agree
601	Strongly Agree	Strongly Agree	Strongly Agree	Strongly Agree	Strongly Agree	Disagree	Neutral	Agree	Strongly Agree	Neutral	Agree	Strongly Agree	Agree	Agree	Strongly Agree	Strongly Agree	Strongly Agree
602	Agree	Agree	Agree	Strongly Agree	Agree	Strongly Agree	Strongly Agree	Strongly Agree	Strongly Agree	Agree	Strongly Agree	Strongly Agree	Strongly Agree	Agree	Agree	Strongly Agree	Strongly Agree
603	Strongly Agree	Strongly Agree	Agree	Strongly Agree	Strongly Agree	Strongly Agree	Strongly Agree	Strongly Agree	Strongly Agree	Strongly Agree	Neutral	Neutral	Neutral	Neutral	Agree	Disagree	Disagree
604	Strongly Agree	Agree	Agree	Strongly Agree	Strongly Agree	Agree	Strongly Agree	Strongly Agree	Strongly Agree	Strongly Agree	Agree	Neutral	Strongly Agree	Agree	Agree	Agree	Agree
605	Strongly Agree	Agree	Strongly Agree	Strongly Agree	Agree	Strongly Agree	Strongly Agree	Agree	Strongly Agree	Neutral	Strongly Agree	Strongly Agree	Agree	Agree	Strongly Agree	Neutral	Agree
606	Agree	Agree	Strongly Agree	Agree	Agree	Strongly Agree	Agree	Strongly Agree	Strongly Agree	Strongly Agree	Agree	Neutral	Agree	Agree	Agree	Agree	Strongly Agree
607	Agree	Neutral	Neutral	Neutral	Strongly Agree	Neutral	Neutral	Agree	Neutral	Strongly Agree	Agree	Neutral	Agree	Neutral	Agree	Strongly Agree	Strongly Agree
608	Strongly Agree	Strongly Agree	Strongly Agree	Strongly Agree	Strongly Agree	Strongly Agree	Agree	Strongly Agree	Strongly Agree	Strongly Agree	Strongly Agree	Agree	Strongly Agree	Strongly Agree	Strongly Agree	Agree	Strongly Agree
609	Strongly Agree	Agree	Strongly Agree	Strongly Agree	Strongly Agree	Strongly Agree	Strongly Agree	Strongly Agree	Strongly Agree	Strongly Agree	Neutral	Agree	Neutral	Neutral	Agree	Strongly Agree	Strongly Agree
610	Strongly Agree	Agree	Strongly Agree	Agree	Agree	Strongly Agree	Agree	Strongly Agree	Strongly Agree	Strongly Agree	Agree	Agree	Strongly Agree	Strongly Agree	Neutral	Strongly Agree	Strongly Agree
611	Agree	Strongly Agree	Neutral	Agree	Agree	Neutral	Agree	Strongly Disagree	Disagree	Disagree	Neutral	Neutral	Agree	Neutral	Strongly Disagree	Strongly Agree	Strongly Agree
612	Neutral	Agree	Agree	Agree	Neutral	Disagree	Strongly Disagree	Neutral	Agree	Neutral	Neutral	Agree	Neutral	Agree	Neutral	Agree	Agree
613	Agree	Strongly Agree	Strongly Agree	Agree	Strongly Agree	Strongly Agree	Strongly Agree	Agree	Agree	Strongly Agree	Agree	Strongly Agree	Strongly Agree	Neutral	Agree	Strongly Agree	Strongly Agree
614	Agree	Strongly Agree	Agree	Agree	Strongly Agree	Strongly Agree	Strongly Agree	Strongly Agree	Strongly Agree	Strongly Agree	Strongly Agree	Agree	Strongly Agree	Strongly Agree	Agree	Strongly Agree	Strongly Agree
615	Strongly Agree	Strongly Agree	Agree	Strongly Agree	Strongly Agree	Strongly Agree	Strongly Agree	Agree	Agree	Strongly Agree	Strongly Agree	Agree	Agree	Agree	Agree	Strongly Agree	Strongly Agree
616	Neutral	Neutral	Agree	Neutral	Agree	Agree	Neutral	Disagree	Neutral	Neutral	Disagree	Neutral	Agree	Neutral	Strongly Disagree	Neutral	Disagree
617	Strongly Agree	Strongly Agree	Agree	Strongly Agree	Strongly Agree	Strongly Agree	Strongly Agree	Strongly Agree	Agree	Strongly Agree	Agree	Agree	Strongly Agree	Neutral	Agree	Agree	Agree
618	Agree	Agree	Neutral	Strongly Agree	Agree	Strongly Agree	Strongly Agree	Strongly Agree	Agree	Strongly Agree	Strongly Agree	Strongly Agree	Strongly Agree	Agree	Strongly Agree	Strongly Agree	Strongly Agree
619	Strongly Disagree	Disagree	Strongly Disagree	Disagree	Disagree	Agree	Agree	Neutral	Agree	Disagree	Disagree	Disagree	Neutral	Neutral	Neutral	Disagree	Neutral
620	Strongly Agree	Strongly Agree	Strongly Agree	Agree	Agree	Strongly Agree	Strongly Agree	Strongly Agree	Agree	Strongly Agree	Neutral	Agree	Agree	Agree	Agree	Strongly Agree	Strongly Agree
621	Strongly Agree	Agree	Strongly Agree	Strongly Agree	Strongly Agree	Strongly Agree	Strongly Agree	Strongly Agree	Strongly Agree	Strongly Agree	Agree	Strongly Agree	Neutral	Agree	Agree	Agree	Strongly Agree
622	Neutral	Agree	Neutral	Neutral	Agree	Disagree	Disagree	Strongly Agree	Strongly Agree	Strongly Agree	Neutral	Agree	Neutral	Neutral	Neutral	Strongly Agree	Strongly Agree
623	Strongly Agree	Strongly Agree	Agree	Strongly Agree	Agree	Strongly Agree	Strongly Agree	Strongly Agree	Strongly Agree	Strongly Agree	Disagree	Neutral	Neutral	Neutral	Neutral	Strongly Agree	Strongly Agree
624	Strongly Agree	Strongly Agree	Strongly Agree	Strongly Agree	Strongly Agree	Disagree	Disagree	Strongly Agree	Agree	Strongly Agree	Neutral	Neutral	Disagree	Disagree	Strongly Disagree	Agree	Neutral
625	Neutral	Neutral	Neutral	Neutral	Agree	Agree	Agree	Strongly Disagree	Neutral	Neutral	Strongly Disagree	Disagree	Neutral	Neutral	Neutral	Disagree	Neutral
626	Strongly Agree	Strongly Agree	Agree	Agree	Strongly Agree	Strongly Agree	Strongly Agree	Strongly Agree	Strongly Agree	Strongly Agree	Neutral	Disagree	Neutral	Agree	Disagree	Strongly Agree	Strongly Agree
627	Strongly Agree	Agree	Strongly Agree	Strongly Agree	Agree	Neutral	Agree	Agree	Strongly Agree	Agree	Agree	Neutral	Neutral	Agree	Agree	Strongly Agree	Strongly Agree
628	Strongly Agree	Agree	Strongly Agree	Strongly Agree	Strongly Agree	Agree	Agree	Strongly Agree	Strongly Agree	Strongly Agree	Strongly Agree	Strongly Agree	Agree	Strongly Agree	Strongly Agree	Strongly Agree	Strongly Agree
629	Strongly Agree	Strongly Agree	Strongly Agree	Agree	Strongly Agree	Disagree	Strongly Disagree	Strongly Agree	Strongly Agree	Strongly Agree	Disagree	Disagree	Neutral	Neutral	Neutral	Agree	Strongly Agree
630	Disagree	Disagree	Neutral	Disagree	Neutral	Strongly Disagree	Neutral	Agree	Neutral	Neutral	Neutral	Neutral	Neutral	Agree	Neutral	Disagree	Agree
631	Disagree	Disagree	Neutral	Neutral	Neutral	Neutral	Disagree	Neutral	Neutral	Agree	Neutral	Neutral	Neutral	Neutral	Disagree	Strongly Disagree	Disagree
632	Agree	Neutral	Strongly Agree	Strongly Agree	Neutral	Strongly Agree	Strongly Agree	Strongly Agree	Neutral	Strongly Agree	Agree	Agree	Neutral	Agree	Agree	Strongly Agree	Strongly Agree
633	Disagree	Neutral	Disagree	Strongly Disagree	Neutral	Disagree	Neutral	Agree	Agree	Neutral	Neutral	Neutral	Neutral	Neutral	Neutral	Disagree	Disagree
634	Neutral	Neutral	Agree	Neutral	Strongly Disagree	Agree	Agree	Neutral	Agree	Neutral	Agree	Agree	Agree	Strongly Agree	Agree	Disagree	Agree
635	Agree	Strongly Agree	Strongly Agree	Agree	Strongly Agree	Strongly Agree	Agree	Strongly Agree	Strongly Agree	Strongly Agree	Agree	Agree	Agree	Neutral	Neutral	Agree	Agree
636	Agree	Agree	Agree	Agree	Strongly Agree	Neutral	Agree	Neutral	Neutral	Neutral	Agree	Agree	Agree	Agree	Agree	Neutral	Neutral
637	Strongly Agree	Strongly Agree	Agree	Strongly Agree	Strongly Agree	Strongly Agree	Strongly Agree	Strongly Agree	Strongly Agree	Agree	Agree	Neutral	Agree	Agree	Neutral	Strongly Agree	Agree
638	Agree	Agree	Agree	Agree	Neutral	Strongly Disagree	Neutral	Agree	Strongly Agree	Neutral	Agree	Strongly Agree	Strongly Agree	Strongly Agree	Agree	Strongly Agree	Agree
639	Neutral	Agree	Agree	Agree	Agree	Neutral	Strongly Disagree	Disagree	Agree	Disagree	Agree	Neutral	Neutral	Strongly Agree	Neutral	Neutral	Neutral
640	Strongly Agree	Strongly Agree	Agree	Strongly Agree	Strongly Agree	Strongly Agree	Strongly Agree	Strongly Agree	Agree	Strongly Agree	Agree	Agree	Neutral	Agree	Neutral	Strongly Agree	Strongly Agree
641	Neutral	Neutral	Strongly Disagree	Disagree	Disagree	Disagree	Disagree	Disagree	Disagree	Disagree	Disagree	Strongly Disagree	Strongly Disagree	Disagree	Neutral	Disagree	Disagree
642	Agree	Agree	Agree	Agree	Agree	Strongly Agree	Agree	Neutral	Disagree	Disagree	Agree	Neutral	Strongly Agree	Neutral	Strongly Agree	Neutral	Strongly Disagree
643	Neutral	Disagree	Neutral	Agree	Neutral	Neutral	Strongly Disagree	Neutral	Neutral	Neutral	Disagree	Disagree	Neutral	Neutral	Neutral	Strongly Disagree	Disagree
644	Neutral	Strongly Disagree	Strongly Disagree	Neutral	Agree	Strongly Disagree	Neutral	Strongly Disagree	Disagree	Disagree	Strongly Disagree	Disagree	Disagree	Disagree	Disagree	Disagree	Disagree
645	Agree	Strongly Agree	Strongly Agree	Agree	Strongly Agree	Agree	Agree	Disagree	Neutral	Neutral	Agree	Agree	Strongly Agree	Strongly Agree	Strongly Agree	Strongly Agree	Strongly Agree
646	Disagree	Neutral	Neutral	Strongly Disagree	Disagree	Neutral	Disagree	Neutral	Neutral	Disagree	Disagree	Disagree	Neutral	Neutral	Strongly Disagree	Disagree	Agree
647	Strongly Disagree	Neutral	Disagree	Neutral	Disagree	Agree	Neutral	Strongly Disagree	Disagree	Strongly Disagree	Agree	Agree	Neutral	Neutral	Strongly Agree	Neutral	Strongly Disagree
648	Agree	Agree	Agree	Agree	Agree	Neutral	Agree	Neutral	Agree	Agree	Disagree	Neutral	Disagree	Neutral	Neutral	Disagree	Disagree
